# Supplementary material for: 96 shRNAs designed for maximal coverage of HIV-1 variants
Source: PubMed Central journal article supplement (PMC2698899; doi:10.1186/1742-4690-6-55), 2009-06-04
Supplement: 1742-4690-6-55-S1.pdf [file 1742-4690-6-55-S1.pdf]

## Other sequences

### Conservation estimates of previously studied si- and shRNAs

One of the two most relevant prior studies compiled **129** previously published si- and shRNAs, and calculated their percentage conservations using 21 nt. windows. For targets longer than 21 nt., they evaluated all possible 21 mers and scored the most highly conserved. Their method differs from ours, in that we considered 19 nt. windows, and generally considered the base position, or first 19 mer the most relevant. To compare our method and data sets with theirs, we took the same sequences, added their **216** proposed sequences, and re-calculated conservations. We found both similarities and differences, but overall both methods agreed. The following table contains the sequence ID # (**S**), the HIV target region, the sequence, the % conservation for the first 21 nucleotides estimated by Naito et. al. (2007), the % conservation for the entire sequence and the first 19 nucleotides in all subtypes, % conservation for the entire sequence and the first 19 nucleotides in all clade B subtypes, and the reference. *n.b.* Much of the information in the following table was reproduced from information originally compiled by **Naito et. al. (2007)**.

| S  | Target  | Sequence                   | %N | All clades |    | Clade B |    | Reference        |
|----|---------|----------------------------|----|------------|----|---------|----|------------------|
|    |         |                            |    | Tot.       | 19 | Tot.    | 19 |                  |
| 1  | U3, nef | AAGGCTACTTCCCTGATTGGC      | 35 | 32         | 33 | 73      | 75 | Dave (2004)      |
| 2  | U3, nef | GCTACTTCCCTGATTGGCA-GAACTA | 19 | 22         | 33 | 62      | 75 | Yamamoto (2006)  |
| 3  | U3, nef | TTCCTGATTGGCAGAACTACA-CAC  | 18 | 25         | 26 | 68      | 70 | Yamamoto (2006)  |
| 4  | U3, nef | GATGGTGCTTCAAGCTAGTAC      | 28 | 45         | 50 | 39      | 40 | Capodici (2002)  |
| 5  | U3, nef | AAGGAGAGAACACCAGCTTGT      | 0  | 1          | 1  | 3       | 5  | Chang (2005)     |
| 6  | U3, nef | AAGGCCCGA-GAGCTGCATCCGG    | 1  | 0          | 0  | 0       | 0  | Suzuki (2005)    |
| 7  | U3, nef | AAGACTGCTGACATCGAGCTT      | 1  | 10         | 10 | 30      | 30 | Suzuki (2005)    |
| 8  | U3      | AAGGGACTTTCCGCTGGGGAC      | 24 | 28         | 28 | 87      | 87 | Suzuki (2005)    |
| 9  | U3      | AACTGGGGAGTGGCGAGCCCT      | 0  | 0          | 0  | 0       | 0  | Suzuki (2005)    |
| 10 | R, TAR  | GTCTCTCTGGTTAGACCAGAT      | 16 | 24         | 24 | 73      | 73 | Yoshinari (2004) |
| 11 | R, TAR  | TTAGACCAGATCTGAGCCTGG      | 16 | 24         | 25 | 81      | 81 | Yoshinari (2004) |
| 12 | R, TAR  | AGACCAGATCTGAGCCTGG        | 16 | 29         | 29 | 83      | 83 | Jacque (2002)    |
| 13 | R, TAR  | CTGGGAGCTCTCTGGCTAACT      | 10 | 19         | 19 | 62      | 62 | Yoshinari (2004) |

| S  | Target          | Sequence                     | %N | All clades |    | Clade B |    | Reference          |
|----|-----------------|------------------------------|----|------------|----|---------|----|--------------------|
|    |                 |                              |    | Tot.       | 19 | Tot.    | 19 |                    |
| 14 | R, TAR          | TCTGGCTAACTAGGGAACCCA        | 11 | 19         | 19 | 65      | 65 | Yoshinari (2004)   |
| 15 | R, polyA        | TGCTTAAGCCTCAATAAAGCT        | 85 | 71         | 71 | 0       | 0  | Yoshinari (2004)   |
| 16 | R, U5           | AAGTAGTGTGTGCCCGTCTGT        | 65 | 49         | 51 | 92      | 94 | Chang (2005)       |
| 17 | U5, PBS         | TCTCTAGCAGTGGCGCCCG          | 92 | 0          | 0  | 0       | 0  | Nishitsuji (2006)  |
| 18 | PBS             | GGTGGCGCCCCAACAGG-GACCTT     | 17 | 0          | 0  | 0       | 0  | Han (2004)         |
| 19 | PBS             | GTGGCGCCCCAACAGGGAC          | 90 | 0          | 0  | 0       | 0  | Das (2004)         |
| 20 | PBS             | TGGCGCCCCAACAGGGACT          | 54 | 0          | 0  | 0       | 0  | Das (2004)         |
| 21 | U5, Y           | GCGGAGGCTAGAAGGAGAG          | 88 | 0          | 0  | 0       | 0  | Das (2004)         |
| 22 | U5, Y, gag      | GGCTAGAAGGAGAGAGATG          | 91 | 0          | 0  | 0       | 0  | Das (2004)         |
| 23 | U5, gag         | AAGGAGAGAGATGGGTGCGA-GAGCGTC | 93 | 0          | 0  | 0       | 0  | ter brake (2006)   |
| 24 | U5, gag         | AGATGGGTGCGAGAGCGTC          | 93 | 0          | 0  | 0       | 0  | Westerhout (2006b) |
| 25 | gag (p17)       | GGGCAAGCAGGGAGCTAGAAC        | 22 | 27         | 29 | 52      | 55 | Capodici (2002)    |
| 26 | gag (p17)       | GGGCAAGCAGGGAGCTA-GAACTT     | 22 | 0          | 29 | 0       | 55 | Han (2004)         |
| 27 | gag (p24)       | GAGAACCAAGGGGAAGTGACA        | 44 | 53         | 64 | 68      | 77 | Capodici (2002)    |
| 28 | gag (p24)       | AATAAATAGTAAGAATGTA          | 77 | 66         | 67 | 61      | 61 | ter brake (2006)   |
| 29 | gag (p24)       | AATAGTAAGAATGTATAGCCC        | 76 | 63         | 63 | 57      | 57 | Chang (2005)       |
| 30 | gag (p24)       | AAGCATTGGGACCAGGAGCGA        | 0  | 0          | 2  | 0       | 4  | Hu (2002)          |
| 31 | gag (p24)       | TAGAAGAAATGATGACAGCATG       | 82 | 76         | 77 | 76      | 76 | ter brake (2006)   |
| 32 | gag (p24)       | AAGAAATGATGACAGCATGTC        | 62 | 62         | 77 | 73      | 76 | Chang (2005)       |
| 33 | gag (p7)        | AAGATTGACTGAGAGACAGG         | 9  | 20         | 21 | 43      | 46 | Novina (2002)      |
| 34 | gag (p7)        | AAGATTGACTGAGAGACAGGCT       | 10 | 19         | 21 | 40      | 46 | Suzuki (2005)      |
| 35 | gag (p7)        | GATTGACTGAGAGACAGG           | 9  | 22         | 22 | 48      | 48 | Song (2003)        |
| 36 | gag (p7)        | GATTGACTGAGAGACAGG           | 9  | 22         | 22 | 48      | 48 | Lee (2005)         |
| 37 | gag (p7)        | GTACTGAGAGACAGGCTAA          | 9  | 28         | 28 | 52      | 52 | Pusch (2003)       |
| 38 | gag(p7,p1), pol | CAGGCTAATTTTTTAGGGAA         | 71 | 74         | 80 | 71      | 74 | ter brake (2006)   |
| 39 | gag (p6), pol   | GAGGAGAGCTTCAGGTTTGGG        | 4  | 9          | 10 | 21      | 21 | Lin (2004)         |
| 40 | pol (prot)      | AGCTCTATTAGATACAGGA          | 45 | 42         | 42 | 66      | 66 | Paul (2003)        |
| 41 | pol (prot)      | GCTCTATTAGATACAGGAGCA        | 47 | 43         | 44 | 67      | 67 | Scherer (2004)     |

| S  | Target             | Sequence                               | %N | All clades |    | Clade B |    | Reference          |
|----|--------------------|----------------------------------------|----|------------|----|---------|----|--------------------|
|    |                    |                                        |    | Tot.       | 19 | Tot.    | 19 |                    |
| 42 | pol (prot)         | ACAGGAGCAGATGATACAGT                   | 60 | 83         | 83 | 84      | 84 | ter brake (2006)   |
| 43 | pol (prot)         | ATGGAAACCAAAAATGATAGG                  | 82 | 76         | 76 | 80      | 80 | ter brake (2006)   |
| 44 | pol (RT)           | CCTATTGAGACTGTACCAG                    | 8  | 6          | 6  | 6       | 6  | Paul (2003)        |
| 45 | pol (RT)           | AAGCCAGGAATGGATGGCCCA                  | 64 | 61         | 62 | 82      | 82 | Chang (2005)       |
| 46 | pol (RT)           | GACAGTACTAAATGGAGAATT                  | 0  | 0          | 27 | 0       | 70 | Sabariegos (2005)  |
| 47 | pol (RT)           | TGAGACACCAGGGATTAGA                    | 23 | 23         | 23 | 52      | 52 | Surabhi (2002)     |
| 48 | pol (RT)           | GAGACACCAGGGATTAGAT                    | 23 | 24         | 24 | 53      | 53 | Surabhi (2002)     |
| 49 | pol (RT)           | TCAATACATGGATGATTTGTA                  | 27 | 25         | 25 | 64      | 65 | Huelsmann (2005)   |
| 50 | pol (p15)          | AAGGAATTGGAGGAAATGAAC                  | 47 | 50         | 52 | 68      | 70 | Chang (2005)       |
| 51 | pol (p15)          | ATTGGAGGAAATGAACAAGT                   | 48 | 76         | 76 | 79      | 79 | ter brake (2006)   |
| 52 | pol (int)          | GGAGAGCAATGGCTAGTGA                    | 59 | 53         | 53 | 59      | 59 | Nishitsuji (2006)  |
| 53 | pol (int)          | AATTAGCAGGAAGATGGCCAG                  | 67 | 71         | 73 | 68      | 69 | Chang (2005)       |
| 54 | pol (int)          | TTAGCAGGAAGATGGCCAGT                   | 67 | 78         | 78 | 78      | 78 | ter brake (2006)   |
| 55 | pol (int)          | ATTCCCTACAATCCCCAAG                    | 51 | 72         | 72 | 82      | 82 | ter brake (2006)   |
| 56 | pol (int),<br>cPPT | CACAATTTTAAAA-<br>GAAAAGGGGGGATTGGGGGG | 91 | 71         | 86 | 64      | 87 | ter brake (2006)   |
| 57 | pol (int)          | TACAGTGCAGGGGAAAGAATA                  | 84 | 79         | 81 | 82      | 86 | ter brake (2006)   |
| 58 | pol (int)          | CAGTGCAGGGGAAAGAATA                    | 84 | 79         | 79 | 82      | 82 | Westerhout (2006b) |
| 59 | pol (int), CTS     | AAAATTCAAATTTTCGGGT                    | 77 | 81         | 81 | 82      | 82 | ter brake (2006)   |
| 60 | pol (int), CTS     | TTCAAATTTTCGGGTTTATT                   | 81 | 84         | 84 | 86      | 86 | ter brake (2006)   |
| 61 | pol (int), CTS     | AATTTTCGGGTTTATTACAG                   | 79 | 84         | 84 | 83      | 83 | ter brake (2006)   |
| 62 | pol (int)          | CTCTGAAAAGGTGAAGGGG-<br>CAGTAGTAAT     | 84 | 68         | 84 | 69      | 84 | ter brake (2006)   |
| 63 | pol (int)          | AAGGTGAAGGGGCAGTAGTAA                  | 70 | 74         | 84 | 79      | 91 | Chang (2005)       |
| 64 | pol (int)          | AAGGGGCAGTAGTAATAGAAG                  | 0  | 0          | 0  | 0       | 0  | Hu (2002)          |
| 65 | pol (int), vif     | TATGGAAAACAGATGCCAGGTG                 | 91 | 88         | 95 | 93      | 95 | ter brake (2006)   |
| 66 | vif                | GGAAAGCTAAGGACTGGTT                    | 0  | 0          | 0  | 0       | 0  | Jacque (2002)      |
| 67 | vif                | GGAAAGCTAAGGACTGGTT                    | 0  | 0          | 0  | 0       | 0  | Joshi (2005)       |
| 68 | vif                | GTTCAGAAGTACACATCCC                    | 61 | 58         | 58 | 73      | 73 | Lee (2005)         |
| 69 | vif                | AGCACACAAGTAGACCCTGA                   | 24 | 11         | 32 | 20      | 36 | Jacque (2002)      |
| 70 | vif                | AGCACACAAGTAGACCCTG                    | 24 | 32         | 32 | 36      | 36 | Jacque (2002)      |
| 71 | vif                | AGCACACAAGTAGACCCTG                    | 24 | 32         | 32 | 36      | 36 | Nishitsuji (2004)  |

| S   | Target   | Sequence                     | %N | All clades |    | Clade B |    | Reference        |
|-----|----------|------------------------------|----|------------|----|---------|----|------------------|
|     |          |                              |    | Tot.       | 19 | Tot.    | 19 |                  |
| 72  | vif      | CTTGGCACTAGCAGCATT           | 6  | 17         | 17 | 33      | 33 | Jacque (2002)    |
| 73  | tat      | CTAGAGCCCTGGAAGCATC          | 8  | 44         | 44 | 69      | 69 | Surabhi (2002)   |
| 74  | tat      | AAGCATCCAGGAAGTCAGCCT        | 10 | 41         | 44 | 66      | 72 | Dave (2004)      |
| 75  | tat      | AACTGCTTGTACCAATTGCTA        | 2  | 2          | 2  | 5       | 5  | Coburn (2002)    |
| 76  | tat      | CTGCTTGTACCAATTGCTATT        | 5  | 12         | 12 | 19      | 19 | Boden (2003a,b)  |
| 77  | tat      | CTGCTTGTACCAATTGCTA          | 3  | 12         | 12 | 9       | 9  | Boden (2004b)    |
| 78  | tat      | CTGCTTGTACCAATTGCTATT        | 5  | 12         | 12 | 19      | 19 | Huelsmann (2005) |
| 79  | tat      | AAGTGTGCTTTCATTGCCAAG        | 5  | 25         | 26 | 37      | 38 | Lee (2003)       |
| 80  | tat, rev | GCCTTAGGCATCTCCTATG          | 1  | 9          | 9  | 6       | 6  | Das (2004)       |
| 81  | tat, rev | TCCTATGGCAGGAA-<br>GAAGCGGAG | 82 | 68         | 80 | 72      | 77 | ter brake (2006) |
| 82  | tat, rev | CCTATGGCAGGAAGAAGCG          | 57 | 80         | 80 | 77      | 77 | Das (2004)       |
| 83  | tat, rev | TATGGCAGGAAGAAGCGGA          | 80 | 82         | 82 | 78      | 78 | Surabhi (2002)   |
| 84  | tat, rev | GAAGCGGAGACAGCGACGA          | 46 | 57         | 57 | 66      | 66 | Surabhi (2002)   |
| 85  | tat, rev | GCGGAGACAGCGACGAAGAGC        | 7  | 21         | 41 | 35      | 59 | Lee (2002)       |
| 86  | tat, rev | GCGGAGACAGCGACGAAGAGC        | 7  | 21         | 41 | 35      | 59 | Li (2003)        |
| 87  | tat, rev | GCGGAGACAGCGACGAAGAGC        | 7  | 21         | 41 | 35      | 59 | Scherer (2004)   |
| 88  | tat, rev | GCGGAGACAGCGACGAAGAGC        | 7  | 21         | 41 | 35      | 59 | Joshi (2005)     |
| 89  | tat, rev | GCGGAGACAGCGACGAAGAGC        | 7  | 21         | 41 | 35      | 59 | Li (2005)        |
| 90  | tat, rev | GACGAAGAGCTCATCAGAACA        | 0  | 0          | 0  | 0       | 0  | Boden (2004a)    |
| 91  | vpu      | AAGAGCAGAAGACAGTGGCAA        | 54 | 56         | 56 | 72      | 72 | Chang (2005)     |
| 92  | vpu, env | AAGACAGTGGCAATGAGAGTG        | 52 | 0          | 0  | 0       | 0  | Chang (2005)     |
| 93  | env      | AAGAGGGGACCAGGGAGAG-<br>CAC  | 0  | 0          | 0  | 0       | 0  | Park (2003)      |
| 94  | env      | AAGTTCTACTGTAATTCAACAC       | 0  | 0          | 0  | 0       | 0  | Park (2003)      |
| 95  | env      | CAACACAACCTGTTAATAGTA        | 4  | 15         | 16 | 27      | 28 | Scherer (2004)   |
| 96  | env      | CACAATCACACTCCCATGCAG        | 1  | 7          | 7  | 12      | 12 | Scherer (2004)   |
| 97  | env      | AAGACTCCCATGCAGAATAC         | 0  | 0          | 0  | 0       | 0  | Park (2003)      |
| 98  | env      | AAGATGTGGCAGGAAGTAGGAC       | 0  | 0          | 0  | 0       | 0  | Park (2003)      |
| 99  | env      | GGAGGAGGCGATATGAGGGAC        | 0  | 0          | 0  | 0       | 0  | Scherer (2004)   |
| 100 | env      | CAGCAGGAAGCACTATGGGCGC       | 76 | 79         | 80 | 88      | 89 | ter brake (2006) |
| 101 | env      | TGTCTGATATAGTGCAGCAGC        | 0  | 0          | 0  | 0       | 0  | Scherer (2004)   |

| S   | Target        | Sequence                     | %N | All clades |    | Clade B |    | Reference            |
|-----|---------------|------------------------------|----|------------|----|---------|----|----------------------|
|     |               |                              |    | Tot.       | 19 | Tot.    | 19 |                      |
| 102 | env           | TCTGTTGCAACTCACAGTCTG        | 24 | 45         | 45 | 65      | 66 | Scherer (2004)       |
| 103 | env           | AACTCACAGTCTGGGGCATCA        | 12 | 42         | 64 | 74      | 82 | Dave (2004)          |
| 104 | tat, rev, env | AAGAAGAAGGTGGAGAGAGAG        | 7  | 30         | 30 | 52      | 53 | Dave (2004)          |
| 105 | rev, env      | AACGGATCCTTGGCACTTATC        | 0  | 0          | 0  | 0       | 0  | Coburn (2002)        |
| 106 | rev, env      | GGCACTTATCTGGGACGAT          | 0  | 0          | 0  | 0       | 0  | Lee (2005)           |
| 107 | rev, env      | GCCTGTGCCTCTTCAGCTACC        | 41 | 55         | 55 | 65      | 65 | Lee (2002)           |
| 108 | rev, env      | GCCTGTGCCTCTTCAGCTACC        | 41 | 55         | 55 | 65      | 65 | Banerjea (2003)      |
| 109 | rev, env      | GCCTGTGCCTCTTCAGCTACC        | 41 | 55         | 55 | 65      | 65 | Li (2003)            |
| 110 | rev, env      | GCCTGTGCCTCTTCAGCTACC        | 41 | 55         | 55 | 65      | 65 | Scherer (2004)       |
| 111 | rev, env      | GCCTGTGCCTCTTCAGCTACC        | 41 | 55         | 55 | 65      | 65 | Unwalla (2004)       |
| 112 | rev, env      | GCCTGTGCCTCTTCAGCTACC        | 41 | 55         | 55 | 65      | 65 | Joshi (2005)         |
| 113 | rev, env      | GCCTGTGCCTCTTCAGCTACC        | 41 | 55         | 55 | 65      | 65 | Unwalla (2006)       |
| 114 | rev, env      | AACGAGGATTGTGGAACCTTCT       | 9  | 18         | 18 | 28      | 28 | Dave (2004)          |
| 115 | env           | AAGAATAAGACAGGGCTTGGGA       | 10 | 26         | 26 | 44      | 44 | Dave (2004)          |
| 116 | env           | AATAAGACAGGGCTTGGAAAG        | 11 | 26         | 27 | 44      | 45 | Dave (2004)          |
| 117 | nef           | AAGTAGTGTGATTGGATGGCC        | 0  | 1          | 1  | 1       | 1  | Chang (2005)         |
| 118 | nef           | AAGGGAAAGAATGAGACGAGC        | 6  | 19         | 27 | 29      | 41 | Dave (2004)          |
| 119 | nef           | CAUGGAGCAAUCACAAGUATT        | 0  | 0          | 0  | 0       | 0  | Sabariegos (2005)    |
| 120 | nef           | GTGCCTGGCTAGAAGCACA          | 12 | 51         | 51 | 68      | 68 | Jacque (2002)        |
| 121 | nef           | GTGCCTGGCTAGAAGCACA          | 12 | 51         | 51 | 68      | 68 | Das (2004)           |
| 122 | nef           | GTGCCTGGCTAGAAGCACA          | 12 | 51         | 51 | 68      | 68 | Westerhout (2005)    |
| 123 | nef           | GTGCCTGGCTAGAAGCACA          | 12 | 51         | 51 | 68      | 68 | Westerhout (2006a,b) |
| 124 | nef           | TTCCAGTCACACCTCAGGTAC        | 2  | 2          | 3  | 4       | 4  | Scherer (2004)       |
| 125 | nef, U3       | CTTTTTAAAAGAAAAGGGGG-GACTGGA | 91 | 75         | 76 | 72      | 73 | ter brake (2006)     |
| 126 | nef, U3       | AAAAGAAAAGGGGGGACTGGA        | 91 | 79         | 80 | 77      | 77 | Dave (2004)          |
| 127 | nef, U3       | GGGGGGACTGGAAGGGCTA          | 14 | 53         | 53 | 73      | 73 | Das (2004)           |
| 128 | nef, U3       | GGGACTGGAAGGGCTAATT          | 11 | 33         | 33 | 47      | 47 | Westerhout (2006b)   |
| 129 | nef, U3       | GACTGGAAGGGCTAATTCA          | 3  | 10         | 10 | 16      | 16 | Nishitsuji (2006)    |
| 130 | Ltr           | CCCTCAGATGCTGCATATAAG        | 75 | 41         | 41 | 52      | 52 | Naito (2007)         |
| 131 | Ltr           | CCTCAGATGCTGCATATAAGC        | 75 | 41         | 41 | 52      | 52 | Naito (2007)         |

| S   | Target | Sequence               | %N | All clades |    | Clade B |     | Reference    |
|-----|--------|------------------------|----|------------|----|---------|-----|--------------|
|     |        |                        |    | Tot.       | 19 | Tot.    | 19  |              |
| 132 | Ltr    | CTCAGATGCTGCATATAAGCA  | 75 | 41         | 41 | 51      | 52  | Naito (2007) |
| 133 | Ltr    | TCAGATGCTGCATATAAGCAG  | 75 | 41         | 41 | 51      | 52  | Naito (2007) |
| 134 | Ltr    | CAGATGCTGCATATAAGCAGC  | 76 | 41         | 41 | 51      | 51  | Naito (2007) |
| 135 | Ltr    | GGGAACCCACTGCTTAAGCCT  | 78 | 64         | 64 | 97      | 97  | Naito (2007) |
| 136 | Ltr    | GGAACCCACTGCTTAAGCCTC  | 81 | 67         | 67 | 97      | 97  | Naito (2007) |
| 137 | Ltr    | GAACCCACTGCTTAAGCCTCA  | 85 | 69         | 69 | 98      | 98  | Naito (2007) |
| 138 | Ltr    | AACCCACTGCTTAAGCCTCAA  | 85 | 69         | 69 | 100     | 100 | Naito (2007) |
| 139 | Ltr    | ACCCACTGCTTAAGCCTCAAT  | 85 | 69         | 69 | 100     | 100 | Naito (2007) |
| 140 | Ltr    | CCCACTGCTTAAGCCTCAATA  | 85 | 70         | 70 | 100     | 100 | Naito (2007) |
| 141 | Ltr    | CCACTGCTTAAGCCTCAATAA  | 85 | 71         | 71 | 100     | 100 | Naito (2007) |
| 142 | Ltr    | CACTGCTTAAGCCTCAATAAA  | 85 | 71         | 71 | 100     | 100 | Naito (2007) |
| 143 | Ltr    | ACTGCTTAAGCCTCAATAAAG  | 85 | 71         | 71 | 100     | 100 | Naito (2007) |
| 144 | Ltr    | CTGCTTAAGCCTCAATAAAGC  | 85 | 71         | 71 | 100     | 100 | Naito (2007) |
| 145 | Ltr    | TGCTTAAGCCTCAATAAAGCT  | 85 | 71         | 71 | 100     | 100 | Naito (2007) |
| 146 | Ltr    | GCTTAAGCCTCAATAAAGCTT  | 86 | 71         | 71 | 100     | 100 | Naito (2007) |
| 147 | Ltr    | CTTAAGCCTCAATAAAGCTTG  | 86 | 71         | 71 | 100     | 100 | Naito (2007) |
| 148 | Ltr    | TTAAGCCTCAATAAAGCTTGC  | 87 | 71         | 71 | 100     | 100 | Naito (2007) |
| 149 | Ltr    | TAAAGCCTCAATAAAGCTTGCC | 87 | 71         | 71 | 100     | 100 | Naito (2007) |
| 150 | Ltr    | AAGCCTCAATAAAGCTTGCCT  | 94 | 90         | 93 | 100     | 100 | Naito (2007) |
| 151 | Ltr    | AGCCTCAATAAAGCTTGCCTT  | 94 | 90         | 91 | 100     | 100 | Naito (2007) |
| 152 | Ltr    | GCCTCAATAAAGCTTGCCTTG  | 95 | 91         | 92 | 100     | 100 | Naito (2007) |
| 153 | Ltr    | CCTCAATAAAGCTTGCCTTGA  | 94 | 92         | 92 | 100     | 100 | Naito (2007) |
| 154 | Ltr    | CTCAATAAAGCTTGCCTTGAG  | 95 | 93         | 93 | 100     | 100 | Naito (2007) |
| 155 | Ltr    | TCAATAAAGCTTGCCTTGAGT  | 88 | 93         | 93 | 100     | 100 | Naito (2007) |
| 156 | Ltr    | CAATAAAGCTTGCCTTGAGTG  | 88 | 93         | 93 | 100     | 100 | Naito (2007) |
| 157 | Ltr    | AATAAAGCTTGCCTTGAGTGC  | 86 | 91         | 93 | 100     | 100 | Naito (2007) |
| 158 | Ltr    | ATAAAGCTTGCCTTGAGTGCT  | 80 | 89         | 93 | 99      | 100 | Naito (2007) |
| 159 | Ltr    | AGTAGTGTGTGCCCGTCTGTT  | 70 | 50         | 52 | 92      | 92  | Naito (2007) |
| 160 | Ltr    | TGACTCTGGTAACTAGAGATC  | 72 | 52         | 53 | 90      | 90  | Naito (2007) |
| 161 | Ltr    | GACTCTGGTAACTAGAGATCC  | 81 | 89         | 90 | 90      | 90  | Naito (2007) |
| 162 | Ltr    | ACTCTGGTAACTAGAGATCCC  | 82 | 91         | 91 | 90      | 90  | Naito (2007) |
| 163 | Ltr    | CTCTGGTAACTAGAGATCCCT  | 87 | 91         | 91 | 90      | 90  | Naito (2007) |
| 164 | Ltr    | TCTGGTAACTAGAGATCCCTC  | 87 | 91         | 91 | 90      | 90  | Naito (2007) |

| S   | Target | Sequence               | %N | All clades |    | Clade B |    | Reference    |
|-----|--------|------------------------|----|------------|----|---------|----|--------------|
|     |        |                        |    | Tot.       | 19 | Tot.    | 19 |              |
| 165 | Ltr    | CTGGTAACTAGAGATCCCTCA  | 88 | 91         | 91 | 90      | 90 | Naito (2007) |
| 166 | Ltr    | TGGTAACTAGAGATCCCTCAG  | 88 | 91         | 91 | 90      | 90 | Naito (2007) |
| 167 | Ltr    | GGTAACTAGAGATCCCTCAGA  | 88 | 90         | 91 | 89      | 90 | Naito (2007) |
| 168 | Ltr    | GTA ACTAGAGATCCCTCAGAC | 88 | 89         | 91 | 86      | 90 | Naito (2007) |
| 169 | Ltr    | TAACTAGAGATCCCTCAGACC  | 84 | 84         | 91 | 83      | 91 | Naito (2007) |
| 170 | Ltr    | AAAATCTCTAGCAGTGGCGCC  | 90 | 0          | 0  | 0       | 0  | Naito (2007) |
| 171 | Ltr    | AAATCTCTAGCAGTGGCGCCC  | 93 | 0          | 0  | 0       | 0  | Naito (2007) |
| 172 | Ltr    | AATCTCTAGCAGTGGCGCCCG  | 92 | 0          | 0  | 0       | 0  | Naito (2007) |
| 173 | Ltr    | ATCTCTAGCAGTGGCGCCCGA  | 92 | 0          | 0  | 0       | 0  | Naito (2007) |
| 174 | Ltr    | TCTCTAGCAGTGGCGCCCGAA  | 93 | 0          | 0  | 0       | 0  | Naito (2007) |
| 175 | Ltr    | CTCTAGCAGTGGCGCCCGAAC  | 93 | 0          | 0  | 0       | 0  | Naito (2007) |
| 176 | Ltr    | TCTAGCAGTGGCGCCCGAACA  | 92 | 0          | 0  | 0       | 0  | Naito (2007) |
| 177 | Ltr    | CTAGCAGTGGCGCCCGAACAG  | 92 | 0          | 0  | 0       | 0  | Naito (2007) |
| 178 | Ltr    | TAGCAGTGGCGCCCGAACAGG  | 94 | 0          | 0  | 0       | 0  | Naito (2007) |
| 179 | Ltr    | AGCAGTGGCGCCCGAACAGGG  | 93 | 0          | 0  | 0       | 0  | Naito (2007) |
| 180 | Ltr    | GCAGTGGCGCCCGAACAGGGA  | 90 | 0          | 0  | 0       | 0  | Naito (2007) |
| 181 | Ltr    | CAGTGGCGCCCGAACAGGGAC  | 90 | 0          | 0  | 0       | 0  | Naito (2007) |
| 182 | Ltr    | TCTCTGACGCAGGACTCGGC   | 85 | 0          | 0  | 0       | 0  | Naito (2007) |
| 183 | Ltr    | CTCTGACGCAGGACTCGGCT   | 88 | 0          | 0  | 0       | 0  | Naito (2007) |
| 184 | Ltr    | TCTGACGCAGGACTCGGCTT   | 89 | 0          | 0  | 0       | 0  | Naito (2007) |
| 185 | Ltr    | CTCGACGCAGGACTCGGCTTG  | 89 | 0          | 0  | 0       | 0  | Naito (2007) |
| 186 | Ltr    | TCGACGCAGGACTCGGCTTGC  | 88 | 0          | 0  | 0       | 0  | Naito (2007) |
| 187 | Ltr    | CGACGCAGGACTCGGCTTGCT  | 89 | 0          | 0  | 0       | 0  | Naito (2007) |
| 188 | Ltr    | GACGCAGGACTCGGCTTGCTG  | 90 | 0          | 0  | 0       | 0  | Naito (2007) |
| 189 | Ltr    | ACGCAGGACTCGGCTTGCTGA  | 88 | 0          | 0  | 0       | 0  | Naito (2007) |
| 190 | Ltr    | TTGACTAGCGGAGGCTAGAA   | 85 | 0          | 0  | 0       | 0  | Naito (2007) |
| 191 | Ltr    | TTGACTAGCGGAGGCTAGAAG  | 87 | 0          | 0  | 0       | 0  | Naito (2007) |
| 192 | Ltr    | TGACTAGCGGAGGCTAGAAGG  | 88 | 0          | 0  | 0       | 0  | Naito (2007) |
| 193 | Ltr    | GACTAGCGGAGGCTAGAAGGA  | 88 | 0          | 0  | 0       | 0  | Naito (2007) |
| 194 | Ltr    | ACTAGCGGAGGCTAGAAGGAG  | 88 | 0          | 0  | 0       | 0  | Naito (2007) |
| 195 | Ltr    | CTAGCGGAGGCTAGAAGGAGA  | 88 | 0          | 0  | 0       | 0  | Naito (2007) |
| 196 | Ltr    | TAGCGGAGGCTAGAAGGAGAG  | 88 | 0          | 0  | 0       | 0  | Naito (2007) |
| 197 | Ltr    | AGCGGAGGCTAGAAGGAGAGA  | 88 | 0          | 0  | 0       | 0  | Naito (2007) |

| S   | Target | Sequence              | %N | All clades |    | Clade B |    | Reference    |
|-----|--------|-----------------------|----|------------|----|---------|----|--------------|
|     |        |                       |    | Tot.       | 19 | Tot.    | 19 |              |
| 198 | Ltr    | GCGGAGGCTAGAAGGAGAGAG | 88 | 0          | 0  | 0       | 0  | Naito (2007) |
| 199 | Ltr    | CGGAGGCTAGAAGGAGAGAGA | 89 | 0          | 0  | 0       | 0  | Naito (2007) |
| 200 | Ltr    | GGAGGCTAGAAGGAGAGAGAT | 88 | 0          | 0  | 0       | 0  | Naito (2007) |
| 201 | Ltr    | GAGGCTAGAAGGAGAGAGATG | 91 | 0          | 0  | 0       | 0  | Naito (2007) |
| 202 | Ltr    | AGGCTAGAAGGAGAGAGATGG | 91 | 0          | 0  | 0       | 0  | Naito (2007) |
| 203 | Ltr    | GGCTAGAAGGAGAGAGATGGG | 91 | 0          | 0  | 0       | 0  | Naito (2007) |
| 204 | Ltr    | GCTAGAAGGAGAGAGATGGGT | 91 | 0          | 0  | 0       | 0  | Naito (2007) |
| 205 | Ltr    | CTAGAAGGAGAGAGATGGGTG | 90 | 0          | 0  | 0       | 0  | Naito (2007) |
| 206 | Ltr    | TAGAAGGAGAGAGATGGGTGC | 90 | 0          | 0  | 0       | 0  | Naito (2007) |
| 207 | Ltr    | AGAAGGAGAGAGATGGGTGCG | 90 | 0          | 0  | 0       | 0  | Naito (2007) |
| 208 | Ltr    | GAAGGAGAGAGATGGGTGCCA | 90 | 0          | 0  | 0       | 0  | Naito (2007) |
| 209 | Ltr    | AAGGAGAGAGATGGGTGCCAG | 92 | 0          | 0  | 0       | 0  | Naito (2007) |
| 210 | Ltr    | AGGAGAGAGATGGGTGCCAGA | 92 | 0          | 0  | 0       | 0  | Naito (2007) |
| 211 | Ltr    | GGAGAGAGATGGGTGCCAGAG | 92 | 0          | 0  | 0       | 0  | Naito (2007) |
| 212 | Ltr    | GAGAGAGATGGGTGCCAGAGC | 93 | 0          | 0  | 0       | 0  | Naito (2007) |
| 213 | Ltr    | AGAGAGATGGGTGCCAGAGCG | 93 | 0          | 0  | 0       | 0  | Naito (2007) |
| 214 | Ltr    | GAGAGATGGGTGCCAGAGCGT | 93 | 0          | 0  | 0       | 0  | Naito (2007) |
| 215 | Ltr    | AGAGATGGGTGCCAGAGCGTC | 93 | 0          | 0  | 0       | 0  | Naito (2007) |
| 216 | Ltr    | GAGATGGGTGCCAGAGCGTCA | 90 | 0          | 0  | 0       | 0  | Naito (2007) |
| 217 | Gag    | TAAATAAAATAGTAAGAATG  | 72 | 63         | 63 | 59      | 59 | Naito (2007) |
| 218 | Gag    | TAAATAAAATAGTAAGAATGT | 77 | 65         | 65 | 60      | 60 | Naito (2007) |
| 219 | Gag    | AAATAAAATAGTAAGAATGTA | 77 | 65         | 65 | 60      | 60 | Naito (2007) |
| 220 | Gag    | AATAAAATAGTAAGAATGTAT | 78 | 65         | 67 | 60      | 61 | Naito (2007) |
| 221 | Gag    | ATAAAATAGTAAGAATGTATA | 78 | 65         | 67 | 60      | 61 | Naito (2007) |
| 222 | Gag    | TAAAATAGTAAGAATGTATAG | 78 | 65         | 65 | 60      | 60 | Naito (2007) |
| 223 | Gag    | AAAATAGTAAGAATGTATAGC | 76 | 63         | 65 | 57      | 60 | Naito (2007) |
| 224 | Gag    | AAATAGTAAGAATGTATAGCC | 76 | 63         | 65 | 57      | 60 | Naito (2007) |
| 225 | Gag    | AATAGTAAGAATGTATAGCCC | 76 | 63         | 63 | 57      | 57 | Naito (2007) |
| 226 | Gag    | ATAGTAAGAATGTATAGCCCT | 76 | 62         | 65 | 56      | 58 | Naito (2007) |
| 227 | Gag    | TAGAAGAAATGATGACAGCAT | 82 | 76         | 77 | 76      | 76 | Naito (2007) |
| 228 | Gag    | AGAAGAAATGATGACAGCATG | 82 | 76         | 76 | 76      | 76 | Naito (2007) |
| 229 | Gag    | GACAGGCTAATTTTTAGGGA  | 71 | 58         | 60 | 71      | 74 | Naito (2007) |
| 230 | Gag    | CAGGCTAATTTTTAGGGAAA  | 70 | 58         | 80 | 42      | 74 | Naito (2007) |



| S   | Target | Sequence              | %N | All clades |    | Clade B |    | Reference    |
|-----|--------|-----------------------|----|------------|----|---------|----|--------------|
|     |        |                       |    | Tot.       | 19 | Tot.    | 19 |              |
| 231 | Gag    | TCCCTCAAATCACTCTTTGGC | 80 | 67         | 67 | 51      | 51 | Naito (2007) |
| 232 | Gag    | CCCTCAAATCACTCTTTGGCA | 82 | 69         | 69 | 52      | 52 | Naito (2007) |
| 233 | Pol    | ACAGGAGCAGATGATACAGTA | 81 | 80         | 83 | 81      | 84 | Naito (2007) |
| 234 | Pol    | CAGGAGCAGATGATACAGTAT | 78 | 76         | 83 | 78      | 84 | Naito (2007) |
| 235 | Pol    | AGGAGCAGATGATACAGTATT | 78 | 76         | 80 | 78      | 81 | Naito (2007) |
| 236 | Pol    | GGAGCAGATGATACAGTATTA | 79 | 79         | 80 | 86      | 87 | Naito (2007) |
| 237 | Pol    | GAGCAGATGATACAGTATTAG | 79 | 78         | 80 | 86      | 87 | Naito (2007) |
| 238 | Pol    | AGCAGATGATACAGTATTAGA | 77 | 78         | 79 | 85      | 86 | Naito (2007) |
| 239 | Pol    | GCAGATGATACAGTATTAGAA | 80 | 79         | 80 | 86      | 87 | Naito (2007) |
| 240 | Pol    | CAGATGATACAGTATTAGAAG | 78 | 77         | 80 | 86      | 87 | Naito (2007) |
| 241 | Pol    | AGATGATACAGTATTAGAAGA | 78 | 77         | 79 | 86      | 87 | Naito (2007) |
| 242 | Pol    | ATGGAAACCAAAAATGATAGG | 82 | 76         | 76 | 80      | 80 | Naito (2007) |
| 243 | Pol    | CCTACACCTGTCAACATAATT | 72 | 66         | 67 | 65      | 65 | Naito (2007) |
| 244 | Pol    | CTACACCTGTCAACATAATTG | 72 | 67         | 67 | 65      | 65 | Naito (2007) |
| 245 | Pol    | TACACCTGTCAACATAATTGG | 72 | 67         | 67 | 65      | 65 | Naito (2007) |
| 246 | Pol    | ACACCTGTCAACATAATTGGA | 73 | 66         | 70 | 66      | 68 | Naito (2007) |
| 247 | Pol    | TAAACAATGGCCATTGACAG  | 70 | 64         | 64 | 80      | 80 | Naito (2007) |
| 248 | Pol    | AAACAATGGCCATTGACAGAA | 73 | 66         | 68 | 81      | 84 | Naito (2007) |
| 249 | Pol    | AACAATGGCCATTGACAGAAG | 73 | 66         | 68 | 81      | 84 | Naito (2007) |
| 250 | Pol    | ACAATGGCCATTGACAGAAGA | 74 | 66         | 66 | 81      | 81 | Naito (2007) |
| 251 | Pol    | AATTGGGCCTGAAAATCCATA | 75 | 76         | 76 | 81      | 81 | Naito (2007) |
| 252 | Pol    | CTGGACTGTCAATGATATACA | 70 | 59         | 59 | 15      | 15 | Naito (2007) |
| 253 | Pol    | ATTGGAGGAAATGAACAAGTA | 77 | 74         | 76 | 78      | 79 | Naito (2007) |
| 254 | Pol    | TTGGAGGAAATGAACAAGTAG | 77 | 74         | 76 | 77      | 79 | Naito (2007) |
| 255 | Pol    | TGGAGGAAATGAACAAGTAGA | 77 | 74         | 74 | 77      | 78 | Naito (2007) |
| 256 | Pol    | GGAGGAAATGAACAAGTAGAT | 71 | 71         | 76 | 77      | 79 | Naito (2007) |
| 257 | Pol    | GAGGAAATGAACAAGTAGATA | 71 | 70         | 76 | 76      | 79 | Naito (2007) |
| 258 | Pol    | AGGAAATGAACAAGTAGATAA | 71 | 70         | 71 | 76      | 77 | Naito (2007) |
| 259 | Pol    | GGAAATGAACAAGTAGATAAA | 71 | 72         | 73 | 76      | 78 | Naito (2007) |
| 260 | Pol    | AATGAACAAGTAGATAAATTA | 72 | 72         | 73 | 76      | 77 | Naito (2007) |
| 261 | Pol    | ATGAACAAGTAGATAAATTAG | 72 | 73         | 73 | 76      | 77 | Naito (2007) |
| 262 | Pol    | TGAACAAGTAGATAAATTAGT | 72 | 72         | 73 | 76      | 76 | Naito (2007) |
| 263 | Pol    | ACAGCAGTACAAATGGCAGTA | 75 | 79         | 82 | 85      | 87 | Naito (2007) |

| S   | Target | Sequence              | %N | All clades |    | Clade B |    | Reference    |
|-----|--------|-----------------------|----|------------|----|---------|----|--------------|
|     |        |                       |    | Tot.       | 19 | Tot.    | 19 |              |
| 264 | Pol    | CAGCAGTACAAATGGCAGTAT | 74 | 78         | 82 | 84      | 87 | Naito (2007) |
| 265 | Pol    | AGCAGTACAAATGGCAGTATT | 74 | 78         | 79 | 84      | 85 | Naito (2007) |
| 266 | Pol    | GCAGTACAAATGGCAGTATTC | 72 | 73         | 78 | 74      | 84 | Naito (2007) |
| 267 | Pol    | CAGTACAAATGGCAGTATTCA | 72 | 72         | 78 | 73      | 84 | Naito (2007) |
| 268 | Pol    | AGTACAAATGGCAGTATTCAT | 72 | 73         | 73 | 74      | 74 | Naito (2007) |
| 269 | Pol    | CACAATTTTAAAAGAAAAGGG | 90 | 86         | 86 | 87      | 87 | Naito (2007) |
| 270 | Pol    | ACAATTTTAAAAGAAAAGGGG | 90 | 85         | 86 | 87      | 87 | Naito (2007) |
| 271 | Pol    | CAATTTTAAAAGAAAAGGGGG | 90 | 86         | 86 | 87      | 87 | Naito (2007) |
| 272 | Pol    | AATTTTAAAAGAAAAGGGGGG | 91 | 88         | 89 | 87      | 87 | Naito (2007) |
| 273 | Pol    | ATTTTAAAAGAAAAGGGGGGA | 91 | 88         | 88 | 87      | 87 | Naito (2007) |
| 274 | Pol    | TTTTAAAAGAAAAGGGGGGAT | 91 | 88         | 88 | 87      | 87 | Naito (2007) |
| 275 | Pol    | TTTAAAAGAAAAGGGGGGATT | 91 | 88         | 88 | 87      | 87 | Naito (2007) |
| 276 | Pol    | TTAAAAGAAAAGGGGGGATTG | 91 | 88         | 88 | 87      | 87 | Naito (2007) |
| 277 | Pol    | TAAAAGAAAAGGGGGGATTGG | 91 | 89         | 89 | 88      | 88 | Naito (2007) |
| 278 | Pol    | AAAAGAAAAGGGGGGATTGGG | 90 | 88         | 89 | 87      | 88 | Naito (2007) |
| 279 | Pol    | AAAGAAAAGGGGGGATTGGGG | 89 | 88         | 89 | 87      | 88 | Naito (2007) |
| 280 | Pol    | AAGAAAAGGGGGGATTGGGGG | 87 | 85         | 88 | 83      | 88 | Naito (2007) |
| 281 | Pol    | AGAAAAGGGGGGATTGGGGGG | 78 | 77         | 91 | 69      | 94 | Naito (2007) |
| 282 | Pol    | GAAAAGGGGGGATTGGGGGGT | 78 | 77         | 88 | 69      | 90 | Naito (2007) |
| 283 | Pol    | AAAAGGGGGGATTGGGGGGTA | 78 | 77         | 78 | 70      | 70 | Naito (2007) |
| 284 | Pol    | AAAGGGGGGATTGGGGGGTAC | 77 | 75         | 78 | 67      | 70 | Naito (2007) |
| 285 | Pol    | AAGGGGGGATTGGGGGGTACA | 77 | 75         | 78 | 66      | 70 | Naito (2007) |
| 286 | Pol    | AGGGGGGATTGGGGGGTACAG | 80 | 76         | 78 | 66      | 67 | Naito (2007) |
| 287 | Pol    | GGGGGGATTGGGGGGTACAGT | 80 | 76         | 78 | 65      | 67 | Naito (2007) |
| 288 | Pol    | GGGGGATTGGGGGGTACAGTG | 80 | 76         | 76 | 65      | 66 | Naito (2007) |
| 289 | Pol    | GGGGATTGGGGGGTACAGTGC | 80 | 76         | 76 | 65      | 66 | Naito (2007) |
| 290 | Pol    | GGGATTGGGGGGTACAGTGCA | 79 | 75         | 76 | 65      | 65 | Naito (2007) |
| 291 | Pol    | GGATTGGGGGGTACAGTGCA  | 79 | 75         | 76 | 65      | 65 | Naito (2007) |
| 292 | Pol    | GATTGGGGGGTACAGTGCAGG | 79 | 75         | 75 | 65      | 65 | Naito (2007) |
| 293 | Pol    | ATTGGGGGGTACAGTGCAGGG | 76 | 72         | 76 | 63      | 65 | Naito (2007) |
| 294 | Pol    | TTGGGGGGTACAGTGCAGGGG | 76 | 72         | 76 | 63      | 65 | Naito (2007) |
| 295 | Pol    | TGGGGGGTACAGTGCAGGGGA | 76 | 72         | 72 | 62      | 63 | Naito (2007) |
| 296 | Pol    | GGGGGGTACAGTGCAGGGGAA | 74 | 70         | 72 | 62      | 63 | Naito (2007) |

| S   | Target | Sequence              | %N | All clades |    | Clade B |    | Reference    |
|-----|--------|-----------------------|----|------------|----|---------|----|--------------|
|     |        |                       |    | Tot.       | 19 | Tot.    | 19 |              |
| 297 | Pol    | GGGGGTACAGTGCAGGGGAAA | 73 | 70         | 72 | 62      | 62 | Naito (2007) |
| 298 | Pol    | GGGGTACAGTGCAGGGGAAAG | 73 | 70         | 70 | 62      | 62 | Naito (2007) |
| 299 | Pol    | GGGTACAGTGCAGGGGAAAGA | 72 | 69         | 70 | 62      | 63 | Naito (2007) |
| 300 | Pol    | GGTACAGTGCAGGGGAAAGAA | 73 | 69         | 71 | 63      | 63 | Naito (2007) |
| 301 | Pol    | GTACAGTGCAGGGGAAAGAAT | 75 | 71         | 71 | 67      | 67 | Naito (2007) |
| 302 | Pol    | TACAGTGCAGGGGAAAGAATA | 84 | 79         | 81 | 82      | 86 | Naito (2007) |
| 303 | Pol    | ACAGTGCAGGGGAAAGAATAA | 72 | 61         | 81 | 32      | 86 | Naito (2007) |
| 304 | Pol    | CAGTGCAGGGGAAAGAATAAT | 72 | 61         | 79 | 32      | 82 | Naito (2007) |
| 305 | Pol    | AGTGCAGGGGAAAGAATAATA | 74 | 65         | 65 | 34      | 34 | Naito (2007) |
| 306 | Pol    | GTGCAGGGGAAAGAATAATAG | 74 | 65         | 65 | 34      | 34 | Naito (2007) |
| 307 | Pol    | TGCAGGGGAAAGAATAATAGA | 74 | 66         | 66 | 34      | 34 | Naito (2007) |
| 308 | Pol    | AAAAATTCAAAATTTTCGGGT | 77 | 80         | 80 | 82      | 82 | Naito (2007) |
| 309 | Pol    | AAAATTCAAAATTTTCGGGTT | 77 | 79         | 81 | 81      | 82 | Naito (2007) |
| 310 | Pol    | AAATTCAAAATTTTCGGGTTT | 79 | 81         | 83 | 81      | 82 | Naito (2007) |
| 311 | Pol    | AATTCAAAATTTTCGGGTTTA | 79 | 81         | 81 | 82      | 82 | Naito (2007) |
| 312 | Pol    | ATTCAAAATTTTCGGGTTTAT | 79 | 82         | 82 | 83      | 83 | Naito (2007) |
| 313 | Pol    | TTCAAATTTTCGGGTTTATT  | 81 | 84         | 84 | 86      | 86 | Naito (2007) |
| 314 | Pol    | TCAAATTTTCGGGTTTATTA  | 77 | 81         | 84 | 80      | 86 | Naito (2007) |
| 315 | Pol    | CAAATTTTCGGGTTTATTAC  | 78 | 82         | 86 | 82      | 88 | Naito (2007) |
| 316 | Pol    | AAAATTTTCGGGTTTATTACA | 78 | 82         | 82 | 82      | 83 | Naito (2007) |
| 317 | Pol    | AAATTTTCGGGTTTATTACAG | 79 | 83         | 84 | 83      | 84 | Naito (2007) |
| 318 | Pol    | CTCTGAAAGGTGAAGGGGCA  | 82 | 82         | 84 | 84      | 84 | Naito (2007) |
| 319 | Pol    | TCTGAAAGGTGAAGGGGCAG  | 82 | 81         | 84 | 83      | 85 | Naito (2007) |
| 320 | Pol    | CTGAAAGGTGAAGGGGCAGT  | 82 | 81         | 82 | 83      | 84 | Naito (2007) |
| 321 | Pol    | TGAAAGGTGAAGGGGCAGTA  | 84 | 85         | 88 | 93      | 95 | Naito (2007) |
| 322 | Pol    | GGAAAGGTGAAGGGGCAGTAG | 84 | 84         | 88 | 91      | 95 | Naito (2007) |
| 323 | Pol    | GAAAGGTGAAGGGGCAGTAGT | 83 | 84         | 85 | 91      | 93 | Naito (2007) |
| 324 | Pol    | AAAGGTGAAGGGGCAGTAGTA | 72 | 76         | 84 | 80      | 91 | Naito (2007) |
| 325 | Pol    | AGGTGAAGGGGCAGTAGTAAT | 70 | 74         | 76 | 79      | 80 | Naito (2007) |
| 326 | Vif    | TATGGAAAACAGATGGCAGGT | 91 | 0          | 0  | 0       | 0  | Naito (2007) |
| 327 | Vif    | ATGGAAAACAGATGGCAGGTG | 90 | 89         | 95 | 93      | 95 | Naito (2007) |
| 328 | Vif    | TCCTATGGCAGGAAGAAGCGG | 82 | 3          | 3  | 2       | 2  | Naito (2007) |
| 329 | Vif    | CCTATGGCAGGAAGAAGCGGA | 80 | 2          | 3  | 2       | 2  | Naito (2007) |

| S                                                    | Target | Sequence              | %N         | All clades |            | Clade B    |            | Reference    |
|------------------------------------------------------|--------|-----------------------|------------|------------|------------|------------|------------|--------------|
|                                                      |        |                       |            | Tot.       | 19         | Tot.       | 19         |              |
| 330                                                  | Vif    | ATGGCAGGAAGAAGCGGAGAC | 70         | 2          | 3          | 3          | 3          | Naito (2007) |
| 331                                                  | Env    | ACAATTGGAGAAGTGAATTAT | 71         | 73         | 74         | 77         | 77         | Naito (2007) |
| 332                                                  | Env    | CAATTGGAGAAGTGAATTATA | 71         | 73         | 74         | 77         | 77         | Naito (2007) |
| 333                                                  | Env    | AGCAGCAGGAAGCACTATGGG | 71         | 75         | 75         | 84         | 84         | Naito (2007) |
| 334                                                  | Env    | GCAGCAGGAAGCACTATGGGC | 72         | 76         | 76         | 84         | 84         | Naito (2007) |
| 335                                                  | Env    | CAGCAGGAAGCACTATGGGCG | 75         | 79         | 80         | 88         | 89         | Naito (2007) |
| 336                                                  | Env    | AGCAGGAAGCACTATGGGCGC | 76         | 81         | 82         | 90         | 91         | Naito (2007) |
| 337                                                  | Env    | ACGCTGACGGTACAGGCCAGA | 72         | 75         | 78         | 76         | 79         | Naito (2007) |
| 338                                                  | Env    | CGCTGACGGTACAGGCCAGAC | 73         | 78         | 82         | 82         | 86         | Naito (2007) |
| 339                                                  | Nef    | CTTTTTAAAAGAAAAGGGGGG | 86         | 76         | 76         | 73         | 73         | Naito (2007) |
| 340                                                  | Nef    | TTTTTAAAAGAAAAGGGGGGA | 90         | 78         | 78         | 74         | 75         | Naito (2007) |
| 341                                                  | Nef    | TTTTAAAAGAAAAGGGGGGAC | 90         | 78         | 79         | 75         | 76         | Naito (2007) |
| 342                                                  | Nef    | TTTAAAAGAAAAGGGGGGACT | 90         | 79         | 79         | 76         | 76         | Naito (2007) |
| 343                                                  | Nef    | TTAAAAGAAAAGGGGGGACTG | 90         | 79         | 79         | 76         | 76         | Naito (2007) |
| 344                                                  | Nef    | TAAAAGAAAAGGGGGGACTGG | 91         | 79         | 80         | 77         | 77         | Naito (2007) |
| 345                                                  | Nef    | AAAAGAAAAGGGGGGACTGGA | 91         | 79         | 80         | 77         | 77         | Naito (2007) |
| <b>Averages w/o Naito et. al. (103 sequences): *</b> |        |                       | <b>34</b>  | <b>42</b>  | <b>45</b>  | <b>55</b>  | <b>59</b>  |              |
| <b># of shRNA &gt; 70 % conserved</b>                |        |                       | <b>188</b> | <b>145</b> | <b>154</b> | <b>149</b> | <b>163</b> |              |
| <b>Averages all (270 sequences): **</b>              |        |                       | <b>63</b>  | <b>62</b>  | <b>64</b>  | <b>68</b>  | <b>71</b>  |              |
| <b># of shRNA &gt; 70 % conserved</b>                |        |                       | <b>20</b>  | <b>22</b>  | <b>25</b>  | <b>32</b>  | <b>39</b>  |              |

\* Twenty six of the 129 sequences published prior to Naito et. al. were excluded from this total as their conservations were unable to be estimated by one of the methods used, or they were 0 % conserved.

\*\* Seventy five of the 345 sequences were excluded from this total as their conservations were unable to be estimated by one of the methods used, or they were 0 % conserved.

## Bibliography

1. Banerjea A, Li MJ, Bauer G, Remling L, Lee NS, Rossi J, Akkina R: Inhibition of HIV-1 by lentiviral vector-transduced siRNAs in T lymphocytes differentiated in SCID-hu mice and CD34+ progenitor cell-derived macrophages. *Mol Ther* 2003, 8:62-71.

2. Boden D, Pusch O, Lee F, Tucker L, Shank PR, Ramratnam B: Promoter choice affects the potency of HIV-1 specific RNA interference. *Nucleic Acids Res* 2003a, 31:5033-5038.
3. Boden D, Pusch O, Lee F, Tucker L, Ramratnam B: Human immunodeficiency virus type 1 escape from RNA interference. *J Virol* 2003b, 77:11531-11535.
4. Boden D, Pusch O, Silbermann R, Lee F, Tucker L, Ramratnam B: Enhanced gene silencing of HIV-1 specific siRNA using microRNA designed hairpins. *Nucleic Acids Res* 2004a, 32:1154-1158.
5. Boden D, Pusch O, Lee F, Tucker L, Ramratnam B: Efficient gene transfer of HIV-1-specific short hairpin RNA into human lymphocytic cells using recombinant adeno-associated virus vectors. *Mol Ther* 2004b, 9:396-402.
6. Capodici J, Karikó K, Weissman D: Inhibition of HIV-1 infection by small interfering RNA-mediated RNA interference. *J Immunol* 2002, 169:5196-5201.
7. Chang LJ, Liu X, He J: Lentiviral siRNAs targeting multiple highly conserved RNA sequences of human immunodeficiency virus type 1. *Gene Ther* 2005, 12:1133-1144.
8. Coburn GA, Cullen BR: Potent and specific inhibition of human immunodeficiency virus type 1 replication by RNA interference. *J Virol* 2002, 76:9225-9231.
9. Das AT, Brummelkamp TR, Westerhout EM, Vink M, Madiredjo M, Bernards R, Berkhout B: Human immunodeficiency virus type 1 escapes from RNA interference-mediated inhibition. *J Virol* 2004, 78:2601-2605.
10. Dave RS, Pomerantz RJ: Antiviral effects of human immunodeficiency virus type 1-specific small interfering RNAs against targets conserved in select neurotropic viral strains. *J Virol* 2004, 78:13687-13696.
11. Han W, Wind-Rotolo M, Kirkman RL, Morrow CD: Inhibition of human immunodeficiency virus type 1 replication by siRNA targeted to the highly conserved primer binding site. *Virology* 2004, 330:221-232.
12. Hu WY, Myers CP, Kilzer JM, Pfaff SL, Bushman FD: Inhibition of retroviral pathogenesis by RNA interference. *Curr Biol* 2002, 12:1301-1311.
13. Huelsmann PM, Rauch P, Allers K, John MJ, Metzner KJ: Inhibition of drug-resistant HIV-1 by RNA interference. *Antiviral Res* 2006, 69:1-8.
14. Jacque JM, Triques K, Stevenson M: Modulation of HIV-1 replication by RNA interference. *Nature* 2002, 418:435-438.
15. Joshi PJ, North TW, Prasad VR: Aptamers directed to HIV-1 reverse transcriptase display greater efficacy over small hairpin RNAs targeted to viral RNA in blocking HIV-1 replication. *Mol Ther* 2005, 11:677-686.
16. Lee MTM, Coburn GA, McClure MO, Cullen BR: Inhibition of human immunodeficiency virus type 1 replication in primary macrophages by using Tat- or CCR5-specific small interfering RNAs expressed from a lentivirus vector. *J Virol* 2003, 77:11964-11972.
17. Lee NS, Dohjima T, Bauer G, Li H, Li MJ, Ehsani A, Salvaterra P, Rossi J: Expression of small interfering RNAs targeted against HIV-1 *rev* transcripts in human cells. *Nat Biotechnol* 2002, 20:500-505.

18. Lee SK, Dykxhoorn DM, Kumar P, Ranjbar S, Song E, Maliszewski LE, François-Bongarçon V, Goldfeld A, Swamy NM, Lieberman J, Shankar P: Lentiviral delivery of short hairpin RNAs protects CD4 T cells from multiple clades and primary isolates of HIV. *Blood* 2005, 106:818-826.
19. Li MJ, Bauer G, Michienzi A, Yee JK, Lee NS, Kim J, Li S, Castanotto D, Zaia J, Rossi JJ: Inhibition of HIV-1 infection by lentiviral vectors expressing Pol III-promoted anti-HIV RNAs. *Mol Ther* 2003, 8:196-206.
20. Li MJ, Kim J, Li S, Zaia J, Yee JK, Anderson J, Akkina R, Rossi JJ: Long-term inhibition of HIV-1 infection in primary hematopoietic cells by lentiviral vector delivery of a triple combination of anti-HIV shRNA, anti-CCR5 ribozyme, and a nucleolar-localizing TAR decoy. *Mol Ther* 2005, 12:900-909.
21. Lin SL, Ying SY: Combinational therapy for potential HIV-1 eradication and vaccination. *Int J Oncol* 2004, 24:81-88.
22. Nishitsuji H, Ikeda T, Miyoshi H, Ohashi T, Kannagi M, Masuda T: Expression of small hairpin RNA by lentivirus-based vector confers efficient and stable gene-suppression of HIV-1 on human cells including primary non-dividing cells. *Microbes Infect* 2004, 6:76-85.
23. Nishitsuji H, Kohara M, Kannagi M, Masuda T: Effective suppression of human immunodeficiency virus type 1 through a combination of short- or long-hairpin RNAs targeting essential sequences for retroviral integration. *J Virol* 2006, 80:7658-7666.
24. Novina CD, Murray MF, Dykxhoorn DM, Beresford PJ, Riess J, Lee SK, Collman RG, Lieberman J, Shankar P, Sharp PA: siRNA-directed inhibition of HIV-1 infection. *Nat Med* 2002, 8:681-686.
25. Park WS, Hayafune M, Miyano-Kurosaki N, Takaku H: Specific HIV-1 env gene silencing by small interfering RNAs in human peripheral blood mononuclear cells. *Gene Ther* 2003, 10:2046-2050.
26. Paul CP, Good PD, Li SXL, Kleihauer A, Rossi JJ, Engelke DR: Localized expression of small RNA inhibitors in human cells. *Mol Ther* 2003, 7:237-247.
27. Pusch O, Boden D, Silbermann R, Lee F, Tucker L, Ramratnam B: Nucleotide sequence homology requirements of HIV-1-specific short hairpin RNA. *Nucleic Acids Res* 2003, 31:6444-6449.
28. Sabariego R, Giménez-Barcons M, Tàpia N, Clotet B, Martínez MA: Sequence homology required by human immunodeficiency virus type 1 to escape from short interfering RNAs. *J Virol* 2006, 80:571-577.
29. Scherer LJ, Yildiz Y, Kim J, Cagnon L, Heale B, Rossi JJ: Rapid assessment of anti-HIV siRNA efficacy using PCR-derived Pol III shRNA cassettes. *Mol Ther* 2004, 10:597-603.
30. Song E, Lee SK, Dykxhoorn DM, Novina C, Zhang D, Crawford K, Cerny J, Sharp PA, Lieberman J, Manjunath N, Shankar P: Sustained small interfering RNA-mediated human immunodeficiency virus type 1 inhibition in primary macrophages. *J Virol* 2003, 77:7174-7181.

31. Surabhi RM, Gaynor RB: RNA interference directed against viral and cellular targets inhibits human immunodeficiency virus type 1 replication. *J Virol* 2002, 76:12963-12973.
32. Suzuki K, Shijuuku T, Fukamachi T, Zaunders J, Guillemin G, Cooper D, Kelleher A: Prolonged transcriptional silencing and CpG methylation induced by siRNAs targeted to the HIV-1 promoter region. *J RNAi Gene Silencing* 2005, 1:66-78.
33. ter Brake O, Konstantinova P, Ceylan M, Berkhout B: Silencing of HIV-1 with RNA interference: a multiple shRNA approach. *Mol Ther* 2006, 14:883-892.
34. Unwalla HJ, Li MJ, Kim JD, Li HT, Ehsani A, Alluin J, Rossi JJ: Negative feedback inhibition of HIV-1 by TAT-inducible expression of siRNA. *Nat Biotechnol* 2004, 22:1573-1578.
35. Unwalla HJ, Li HT, Bahner I, Li MJ, Kohn D, Rossi JJ: Novel Pol II fusion promoter directs human immunodeficiency virus type 1-inducible coexpression of a short hairpin RNA and protein. *J Virol* 2006, 80:1863-1873.
36. Westerhout EM, Ooms M, Vink M, Das AT, Berkhout B: HIV-1 can escape from RNA interference by evolving an alternative structure in its RNA genome. *Nucleic Acids Res* 2005, 33:796-804.
37. Westerhout EM, Vink M, Haasnoot PCJ, Das AT, Berkhout B: A conditionally replicating HIV-based vector that stably expresses an antiviral shRNA against HIV-1 replication. *Mol Ther* 2006a, 14:268-275.
38. Westerhout EM, ter Brake O, Berkhout B: The virion-associated incoming HIV-1 RNA genome is not targeted by RNA interference. *Retrovirology* 2006b, 3:57.
39. Yamamoto T, Miyoshi H, Yamamoto N, Yamamoto N, Inoue J, Tsunetsugu-Yokota Y: Lentivirus vectors expressing short hairpin RNAs against the U3-overlapping region of HIV *nef* inhibit HIV replication and infectivity in primary macrophages. *Blood* 2006, 108:3305-3312.
40. Yoshinari K, Miyagishi M, Taira K: Effects on RNAi of the tight structure, sequence and position of the targeted region. *Nucleic Acids Res* 2004, 32:691-699.
