# Supplementary material for: 96 shRNAs designed for maximal coverage of HIV-1 variants
Source: PubMed Central journal article supplement (PMC2698899; doi:10.1186/1742-4690-6-55), 2009-06-04
Supplement: 1742-4690-6-55-S2.pdf [file 1742-4690-6-55-S2.pdf]

## The HIV sequence sets

The following table shows the number of individual sequences in each gene set from LANL, Virco and both combined. It also shows the number and percentage of LANL sequences that were clade B, as well as the average length of the sequences from each LANL gene set compared to the corresponding gene length from NL4-3. The LANL sequences are available on request.

| Gene            | LANL (all)   | Virco      | LANL (+V.)   | LANL (B)     | LANL % B   | LANL len. | NL4-3 len.         |
|-----------------|--------------|------------|--------------|--------------|------------|-----------|--------------------|
| LTR             | 382          |            | 382          | 111          | 29%        | 636       | 634                |
| Gag             | 1610         |            | 1610         | 748          | 46%        | 1497      | 1503               |
| Pol             | 1567         |            | 1567         | 438          | 28%        | 3007      | 3012               |
| Vif             | 2507         | 105        | 2612         | 1253         | 48%        | 579       | 579                |
| Vpr             | 2319         | 105        | 2424         | 998          | 41%        | 291       | <b>288 (291) *</b> |
| Tat (x1)        | 3262         | 105        | 3367         | 1500         | 45%        | 215       | 215                |
| Rev (x1)        | 3403         | 105        | 3508         | 1530         | 44%        | 76        | 76                 |
| Vpu             | 2442         | 105        | 2547         | 886          | 35%        | 251       | <b>243 (246) *</b> |
| Env             | 3560         |            | 3560         | 2026         | 57%        | 2574      | 2565               |
| Tat (x2)        | 5781         | 83         | 5864         | 2961         | 50%        | 91        | 46                 |
| Rev (x2)        | 5469         | 83         | 5552         | 2771         | 50%        | 280       | 275                |
| Nef             | 4873         | 83         | 4956         | 3106         | 63%        | 622       | <b>618 (621) *</b> |
| <b>Totals :</b> | <b>37175</b> | <b>774</b> | <b>37949</b> | <b>18328</b> | <b>45%</b> |           |                    |

*nb. The Virco data included a small amount of LTR sequence with the Nef data, which as used where possible, but not included in the above sequence tallies.*

*\* the native 3 nt. stop codons (the last 3 nucleotides) were excluded from the individual gene fragment sequences used in this study as it they were not included our reporters, however, the missing 3 nt. sequences were included in overlapping gene fragments.*

## The 19 mer target sets

If the complete genome for the NL4-3 strain was broken into all possible 19 mers there would be **9, 691** sequences (nb. including duplicate LTR sequences). By using individual gene sets we generated **9, 838** 19 mer sequences. This included **936** duplicate and **28** triplicate sequences from partially overlapping genes. There were also **227** sequences missing (or **2.3** % of all possible 19 mers) due to several inter-gene gaps. Notably, this included **173** sequences between the 5' LTR and Gag (617 - 789; NL4-3 co-ordinates) which covered the highly structured packaging signal **psi ( $\Psi$ )**. However, this region was covered by Naito *et. al.* (2007), using full-length genomes to estimate conservations. Excluding overlapping and LTR duplicate sequences, our pool of potential HIV-1 targets contained **8, 846 unique** 19 mer sequences.

| Gene           | NL4-3 19mers | LANL 19mers | Virco 19mers * | LANL + V 19mers | 19:19 Comparisons                                     |
|----------------|--------------|-------------|----------------|-----------------|-------------------------------------------------------|
| LTR            | 616          | 235913      | 85889          | 321802          | 198230032                                             |
| Gag            | 1485         | 2381419     |                | 2381419         | 3536407215                                            |
| Pol            | 2994         | 4684143     |                | 4684143         | 14024324142                                           |
| Vif            | 561          | 1407036     | 131805         | 1538841         | 863289801                                             |
| Vpr            | 270          | 633152      | 131805         | 764957          | 206538390                                             |
| Tat (x1)       | 197          | 642158      | 131805         | 773963          | 152470711                                             |
| Rev (x1)       | 58           | 197213      | 131805         | 329018          | 19083044                                              |
| Vpu            | 225          | 567764      | 131805         | 699569          | 157403025                                             |
| Env            | 2547         | 9097846     |                | 9097846         | 23172213762                                           |
| Tat (x2)       | 28           | 422240      | 85889          | 508129          | 14227612                                              |
| Rev (x2)       | 257          | 1431363     | 85889          | 1517252         | 389933764                                             |
| Nef            | 600          | 2943335     | 85889          | 3029224         | 1817534400                                            |
| <b>Totals:</b> | <b>9838</b>  |             |                |                 | <b>Total 19mer to 19 mer comparisons: 44551655898</b> |
| <b>Unique:</b> | <b>8846</b>  |             |                |                 | <b>Total 19 mers: 24861276</b>                        |

\* The Virco data was generated as two groups of sequence for each sample. The first sequence covered the Vif, Vpr, Tat (exon 1), Rev (exon 1) and Vpu regions (105 sequences and 131805 19 mers), the second sequence covered the Tat (exon 2), Rev (exon 2), and Nef regions including a small amount of overlapping LTR sequence (83 sequences and 85889 19 mers). Each group was only counted once in the tally of total 19 mers analyzed (i.e. the sum of the LANL 19 mers + 131805 + 85889), rather than being counted 5 and 4 times respectively. However, all sequences in each group were compared to the corresponding NL4-3 19 mers and thus were included in the the tally of of total 19 mer : 19 mer comparisons.

## Conservation summary

**8,846** unique 19 mers from NL4-3 were compared against the 19 mers from the LANL and Virco HIV gene fragment sequence sets. The following table categorizes the conservation results, showing the number of targets and the percentage of the total 8,846 NL4-3 19 mer targets that were in each category, for both all clades (LANL and Virco) and clade B only (LANL only).

| Conservation                           | LANL + Virco all clades |              | LANL subtype B |              |
|----------------------------------------|-------------------------|--------------|----------------|--------------|
|                                        | % of targets            | # of targets | % of targets   | # of targets |
| 100%                                   | 0.0                     | 0            | 0.5            | 44           |
| > 90 %                                 | 0.5                     | 40           | 1.2            | 102          |
| > 70 %                                 | 2.8                     | 246          | 13.9           | 1227         |
| > 50 %                                 | 10.4                    | 921          | 37.1           | 3286         |
| <b>Total number of 19 mer targets:</b> |                         | <b>8846</b>  |                |              |

## The selected targets

The following table shows the **96** selected targets, along with sequence at the p -2, -1 and p +1, +2 positions, the loop sequence used, and a termination spacer base (**Tsp.**) if used. For targets that were made into a 20 bp hairpin, the last nucleotide of the loop was selected to be the complement of the last nucleotide of the p+2 position so that if the processed siRNA product(s) included the the last nucleotide of the loop then it too would be matched to the target. For targets made into a 21 bp hairpin, we used our default loop sequence (**ACTCGAGA**). The hairpins in which the last base of the anti-sense stem was 'T' also included a 'termination spacer' (**Tsp.**) so as to prevent premature termination via an early run of 'T's. This nucleotide was always the complement of the first nucleotide of the p-1 position (but never a 'T'), so that if included in the processed siRNA product(s) it was also matched to the target.

| #  | Target     | p-2,1 | Core 19 mer (p0)     | p+1,2 | Loop     | Tsp. |
|----|------------|-------|----------------------|-------|----------|------|
| 1  | LTR 63-20  | CA    | CAAGGCTACTTCCCTGATT  | GG    | CCTCGAGC |      |
| 2  | LTR 506-20 | AG    | GGAACCCACTGCTTAAGCC  | TC    | GCTCGAGG |      |
| 3  | LTR 507-20 | GG    | GAACCCACTGCTTAAGCCT  | CA    | TCTCGAGT |      |
| 4  | LTR 509-20 | GA    | ACCCACTGCTTAAGCCTCA  | AA    | ACTCGAGA |      |
| 5  | LTR 510-21 | AA    | CCCACTGCTTAAGCCTCAA  | TA    | ACTCGAGA |      |
| 6  | LTR 516-21 | CT    | GCTTAAGCCTCAATAAAGC  | TT    | ACTCGAGA |      |
| 7  | LTR 522-20 | AA    | GCCTCAATAAAGCTTGCCT  | TG    | CCTCGAGC |      |
| 8  | LTR 527-21 | TC    | AATAAAGCTTGCCTTGAGT  | GC    | ACTCGAGA | G    |
| 9  | LTR 553-20 | AA    | GTAGTGTGTGCCCGTCTGT  | TG    | CCTCGAGC |      |
| 10 | Gag 532-20 | AA    | GGAGCCACCCACACAAGATT | TA    | TCTCGAGT |      |
| 11 | Gag 532-21 | AA    | GGAGCCACCCACACAAGATT | TA    | ACTCGAGA |      |
| 12 | Gag 533-20 | AG    | GAGCCACCCACACAAGATTT | AA    | TCTCGAGT |      |
| 13 | Gag 533-21 | AG    | GAGCCACCCACACAAGATTT | AA    | ACTCGAGA |      |
| 14 | Gag 534-20 | GG    | AGCCACCCACACAAGATTTA | AA    | TCTCGAGT | C    |
| 15 | Gag 534-21 | GG    | AGCCACCCACACAAGATTTA | AA    | ACTCGAGA | C    |
| 16 | Gag 535-20 | GA    | GCCACCCACACAAGATTTAA | AT    | ACTCGAGA |      |
| 17 | Gag 578-20 | GG    | GACATCAAGCAGCCATGCA  | AA    | TCTCGAGT |      |
| 18 | Gag 698-20 | GG    | GAAGTGACATAGCAGGAAC  | TA    | TCTCGAGT |      |
| 19 | Pol 242-20 | AG    | ATACAGGAGCAGATGATAC  | AG    | CCTCGAGC | C    |
| 20 | Pol 246-21 | AC    | AGGAGCAGATGATACAGTA  | TT    | ACTCGAGA | G    |

| #  | Target      | p-2,1 | Core 19 mer (p0)    | p+1,2 | Loop     | Tsp. |
|----|-------------|-------|---------------------|-------|----------|------|
| 21 | Pol 247-21  | CA    | GGAGCAGATGATACAGTAT | TA    | ACTCGAGA |      |
| 22 | Pol 248-20  | AG    | GAGCAGATGATACAGTATT | AG    | CCTCGAGC |      |
| 23 | Pol 248-21  | AG    | GAGCAGATGATACAGTATT | AG    | ACTCGAGA |      |
| 24 | Pol 249-20  | GG    | AGCAGATGATACAGTATTA | GA    | TCTCGAGT | C    |
| 25 | Pol 249-21  | GG    | AGCAGATGATACAGTATTA | GA    | ACTCGAGA | C    |
| 26 | Pol 250-20  | GA    | GCAGATGATACAGTATTAG | AA    | TCTCGAGT |      |
| 27 | Pol 250-21  | GA    | GCAGATGATACAGTATTAG | AA    | ACTCGAGA |      |
| 28 | Pol 251-20  | AG    | CAGATGATACAGTATTAGA | AG    | CCTCGAGC |      |
| 29 | Pol 404-20  | AC    | CTACACCTGTCAACATAAT | TG    | CCTCGAGC |      |
| 30 | Pol 529-21  | TT    | AAACAATGGCCATTGACAG | AA    | ACTCGAGA | A    |
| 31 | Pol 921-20  | GG    | ATGGAAGGATCACCAGCA  | AT    | ACTCGAGA | C    |
| 32 | Pol 925-20  | GG    | AAAGGATCACCAGCAATAT | TC    | GCTCGAGG | C    |
| 33 | Pol 926-20  | GA    | AAGGATCACCAGCAATATT | CC    | GCTCGAGG |      |
| 34 | Pol 1161-20 | TA    | TGAACTCCATCCTGATAAA | TG    | CCTCGAGC |      |
| 35 | Pol 2668-21 | CA    | GCAGTACAAATGGCAGTAT | TC    | ACTCGAGA |      |
| 36 | Pol 2670-21 | GC    | AGTACAAATGGCAGTATTC | AT    | ACTCGAGA | G    |
| 37 | Pol 2671-21 | CA    | GTACAAATGGCAGTATTCA | TC    | ACTCGAGA |      |
| 38 | Pol 2724-20 | GG    | GTACAGTGCAGGGGAAAGA | AT    | ACTCGAGA |      |
| 39 | Pol 2726-21 | GT    | ACAGTGCAGGGGAAAGAAT | AG    | ACTCGAGA | A    |
| 40 | Pol 2750-20 | AG    | ACATAATAGCAACAGACAT | AC    | GCTCGAGG | C    |
| 41 | Pol 2873-21 | CT    | GGAAAGGTGAAGGGGCAGT | AG    | ACTCGAGA |      |
| 42 | Pol 2874-21 | TG    | GAAAGGTGAAGGGGCAGTA | GT    | ACTCGAGA |      |
| 43 | Pol 2878-20 | AA    | GGTGAAGGGGCAGTAGTAA | TA    | TCTCGAGT |      |
| 44 | Pol 2878-21 | AA    | GGTGAAGGGGCAGTAGTAA | TA    | ACTCGAGA |      |
| 45 | Pol 2879-20 | AG    | GTGAAGGGGCAGTAGTAAT | AC    | GCTCGAGG |      |
| 46 | Pol 2879-21 | AG    | GTGAAGGGGCAGTAGTAAT | AC    | ACTCGAGA |      |
| 47 | Pol 2880-20 | GG    | TGAAGGGGCAGTAGTAATA | CA    | TCTCGAGT |      |
| 48 | Pol 2881-21 | GT    | GAAGGGGCAGTAGTAATAC | AA    | ACTCGAGA |      |
| 49 | Pol 2882-21 | TG    | AAGGGGCAGTAGTAATACA | AG    | ACTCGAGA | C    |
| 50 | Pol 2885-20 | AG    | GGGCAGTAGTAATACAAGA | TA    | TCTCGAGT |      |
| 51 | Vif 9-21    | AA    | CAGATGGCAGGTGATGATT | GT    | ACTCGAGA |      |
| 52 | Vif 10-21   | AC    | AGATGGCAGGTGATGATTG | TG    | ACTCGAGA | G    |
| 53 | Vif 11-21   | CA    | GATGGCAGGTGATGATTGT | GT    | ACTCGAGA |      |

| #  | Target          | p-2,1 | Core 19 mer (p0)    | p+1,2 | Loop     | Tsp. |
|----|-----------------|-------|---------------------|-------|----------|------|
| 54 | Vif 12-20       | AG    | ATGGCAGGTGATGATTGTG | TG    | CCTCGAGC | C    |
| 55 | Vif 14-21       | AT    | GGCAGGTGATGATTGTGTG | GC    | ACTCGAGA |      |
| 56 | Vif 15-21       | TG    | GCAGGTGATGATTGTGTGG | CA    | ACTCGAGA |      |
| 57 | Vif 37-20       | AA    | GTAGACAGGATGAGGATTA | AC    | GCTCGAGG |      |
| 58 | Tat (x1) 131-20 | AG    | GCATCTCCTATGGCAGGAA | GA    | TCTCGAGT |      |
| 59 | Tat (x1) 132-21 | GG    | CATCTCCTATGGCAGGAAG | AA    | ACTCGAGA |      |
| 60 | Tat (x1) 140-21 | CT    | ATGGCAGGAAGAAGCGGAG | AC    | ACTCGAGA | A    |
| 61 | Tat (x1) 143-21 | TG    | GCAGGAAGAAGCGGAGACA | GC    | ACTCGAGA |      |
| 62 | Tat (x1) 147-20 | AG    | GAAGAAGCGGAGACAGCGA | CG    | CCTCGAGC |      |
| 63 | Rev (x1) 9-20   | GG    | AAGAAGCGGAGACAGCGAC | GA    | TCTCGAGT | C    |
| 64 | Vpu 139-21      | TA    | GAAAGAGCAGAAGACAGTG | GC    | ACTCGAGA |      |
| 65 | Vpu 140-20      | AG    | AAAGAGCAGAAGACAGTGG | CA    | TCTCGAGT | C    |
| 66 | Vpu 140-21      | AG    | AAAGAGCAGAAGACAGTGG | CA    | ACTCGAGA | C    |
| 67 | Vpu 141-20      | GA    | AAGAGCAGAAGACAGTGGC | AA    | TCTCGAGT |      |
| 68 | Vpu 143-20      | AA    | GAGCAGAAGACAGTGGCAA | TG    | CCTCGAGC |      |
| 69 | Vpu 144-20      | AG    | AGCAGAAGACAGTGGCAAT | GA    | TCTCGAGT | C    |
| 70 | Vpu 144-21      | AG    | AGCAGAAGACAGTGGCAAT | GA    | ACTCGAGA | C    |
| 71 | Vpu 145-20      | GA    | GCAGAAGACAGTGGCAATG | AG    | CCTCGAGC |      |
| 72 | Vpu 146-20      | AG    | CAGAAGACAGTGGCAATGA | GA    | TCTCGAGT |      |
| 73 | Vpu 147-21      | GC    | AGAAGACAGTGGCAATGAG | AG    | ACTCGAGA | G    |
| 74 | Vpu 148-21      | CA    | GAAGACAGTGGCAATGAGA | GT    | ACTCGAGA |      |
| 75 | Vpu 149-20      | AG    | AAGACAGTGGCAATGAGAG | TG    | CCTCGAGC | C    |
| 76 | Env 628-20      | AG    | CCAATTCCCATACATTATT | GT    | ACTCGAGA |      |
| 77 | Env 1423-20     | GG    | GACAATTGGAGAAGTGAAT | TA    | TCTCGAGT |      |
| 78 | Env 1423-21     | GG    | GACAATTGGAGAAGTGAAT | TA    | ACTCGAGA |      |
| 79 | Env 1424-21     | GG    | ACAATTGGAGAAGTGAATT | AT    | ACTCGAGA | C    |
| 80 | Env 1425-20     | GA    | CAATTGGAGAAGTGAATTA | TA    | TCTCGAGT |      |
| 81 | Env 1425-21     | GA    | CAATTGGAGAAGTGAATTA | TA    | ACTCGAGA |      |
| 82 | Env 1426-21     | AC    | AATTGGAGAAGTGAATTAT | AT    | ACTCGAGA | G    |
| 83 | Env 1428-21     | AA    | TTGGAGAAGTGAATTATAT | AA    | ACTCGAGA |      |
| 84 | Env 1431-21     | TG    | GAGAAGTGAATTATATAAA | TA    | ACTCGAGA |      |
| 85 | Env 1432-20     | GG    | AGAAGTGAATTATATAAAT | AT    | ACTCGAGA | C    |
| 86 | Env 1432-21     | GG    | AGAAGTGAATTATATAAAT | AT    | ACTCGAGA | C    |

| #  | Target          | p-2,1 | Core 19 mer (p0)    | p+1,2 | Loop     | Tsp. |
|----|-----------------|-------|---------------------|-------|----------|------|
| 87 | Env 1433-20     | GA    | GAAGTGAATTATATAAATA | TA    | TCTCGAGT |      |
| 88 | Env 1433-21     | GA    | GAAGTGAATTATATAAATA | TA    | ACTCGAGA |      |
| 89 | Env 1434-20     | AG    | AAGTGAATTATATAAATAT | AA    | TCTCGAGT | C    |
| 90 | Env 1436-20     | AA    | GTGAATTATATAAATATAA | AG    | CCTCGAGC |      |
| 91 | Env 1437-20     | AG    | TGAATTATATAAATATAAA | GT    | ACTCGAGA |      |
| 92 | Env 2308-20     | TG    | AGAGACTTACTCTTGATTG | TA    | TCTCGAGT | C    |
| 93 | Rev (x2) 158-20 | CT    | TGAGAGACTTACTCTTGAT | TG    | CCTCGAGC |      |
| 94 | Rev (x2) 159-20 | TT    | GAGAGACTTACTCTTGATT | GT    | ACTCGAGA |      |
| 95 | Nef 350-20      | CA    | CACAAGGCTACTTCCCTGA | TT    | ACTCGAGA |      |
| 96 | Nef 351-20      | AC    | ACAAGGCTACTTCCCTGAT | TG    | CCTCGAGC | G    |

*n.b.* The target positions are the co-ordinates within each gene of NL4-3.

## The 22 regions

The following table shows the regions # (**R**), the shRNA # (**hp #**), the number of shRNA within each region (**T**), the starting co-ordinates of the first and last target within each region (and the specific gene product area if applicable), whether or not the region was unique amongst all previously made (**U14**: 14 regions were unique) or previously proposed (**U11**: 11 regions were unique) targets (see **Additional file 1** and Naito *et. at.* (2007)), and the sequence of the region spanning the first nucleotide of the first p0 19 mer target core to the last nucleotide of the last p0 19 mer target core within each region. n.b. the common regions cover the overlapping 19 nt. cores only, i.e. some of the first nucleotides of the p-2 and p-1 positions, and some of the final nucleotides of the p+1 and p+2 positions are not covered (see the individual core data after for these).

| R  | hp #     | T  | Target                         | U14 | U11 | Sequence region                                                            |
|----|----------|----|--------------------------------|-----|-----|----------------------------------------------------------------------------|
| 1  | 1, 95-96 | 3  | LTR 63 (U3) / Nef 350-52       | U   | U   | CACAAGGCTACTTCCCTGATTG<br>GGAACCCACTGCTTAAGCCTCAATAAAGCTTGCCCTT-<br>GAGTGC |
| 2  | 2-8.     | 7  | LTR 506-27 (R)                 |     |     |                                                                            |
| 3  | 9        | 1  | LTR 553 (U5)                   | U   |     | GTAGTGTGTGCCCGTCTGTT                                                       |
| 4  | 10-16.   | 7  | Gag 532-35 (P24: CA)           | U   | U   | GGAGCCACCCCACAAGATTTAAA                                                    |
| 5  | 17       | 1  | Gag 578 (P24: CA)              | U   | U   | GACATCAAGCAGCCATGCAA                                                       |
| 6  | 18       | 1  | Gag 698 (P24: CA)              | U   | U   | GAAGTGACATAGCAGGAACT                                                       |
| 7  | 19-28    | 10 | Pol 242-51                     |     |     | ATACAGGAGCAGATGATACAGTATTAGAA                                              |
| 8  | 29       | 1  | Pol 404                        | U   |     | CTACACCTGTCAACATAATT                                                       |
| 9  | 30       | 1  | Pol 529 (P51: RT)              | U   |     | AAACAATGGCCATTGACAGAA                                                      |
| 10 | 31-33    | 3  | Pol 921-26 (P51: RT)           |     |     | ATGGAAAGGATCACCAGCAATATTC                                                  |
| 11 | 34       | 1  | Pol 1161 (P51: RT)             | U   | U   | TGAACTCCATCCTGATAAAT                                                       |
| 12 | 35-37    | 3  | Pol 2668-71 (P31: IN)          |     |     | GCAGTACAAATGGCAGTATTCATC                                                   |
| 13 | 38-39    | 2  | Pol 2724-26 (P31: IN)          |     |     | GTACAGTGCAGGGGAAAGAATAG                                                    |
| 14 | 40       | 1  | Pol 2750 (P31: IN)             | U   | U   | ACATAATAGCAACAGACATA                                                       |
| 15 | 41-50    | 10 | Pol 2873-85 (P31: IN)          |     |     | GGAAAGGTGAAGGGGCAGTAGTAATACAAGAT                                           |
| 16 | 51-56    | 6  | Vif 9-15 (P31: IN, Vif)        | U   | U   | CAGATGGCAGGTGATGATTGTGTGGCA                                                |
| 17 | 57       | 1  | Vif 37 (P31: IN, Vif-xj)       | U   | U   | GTAGACAGGATGAGGATTAA                                                       |
| 18 | 58-63    | 6  | Tat (x1) 131-43 / Rev (x1) 8-9 | U   | U   | GCATCTCCTATGGCAGGAAGAAGCGGAGACAG-<br>CGACG                                 |
| 19 | 64-77    | 12 | Vpu 139-49                     |     |     | GAAAGAGCAGAAGACAGTGGCAATGAGAGT                                             |
| 20 | 76       | 1  | Env 628 (GP120)                | U   | U   | CCAATCCCATACATTATTG                                                        |



| R  | hp #  | T  | Target                               | U14 | U11 | Sequence region                    |
|----|-------|----|--------------------------------------|-----|-----|------------------------------------|
| 21 | 77-91 | 15 | Env 1423-37 (GP120)                  |     |     | GACAATTGGAGAAGTGAATTATATAAATATAAAG |
| 22 | 92-94 | 4  | Env 2308 (GP41) / Rev<br>(x2) 158-60 | U   | U   | TGAGAGACTTACTCTTGATTGTGT           |

*n.b.* CA: Capsid, RT: Reverse Transcriptase, IN: Integrase, x1: exon1, x2: exon2, xj: crosses and ORF junction.

U14: These are the 14 regions that are unique amongst all previously made and published si- and shRNAs.

U11: These are the 11 regions that are unique amongst all previously proposed targets.

## Matched target pairs

The 96 hairpins were comprised of 53 hairpins with 20 bp stems, and 43 hairpins with 21 bp stems, including **14** matched pairs of hairpins with 20 and 21 bp stems designed to the same target site. The pairs are listed in the following with the 3 replicate fluorescence values (as a % of the control) from the fluorescent reporter assays used for statistical analysis shown.

| Pair      | First shRNA |             | Replicate % F. |      |      | Second shRNA |             | Replicate % F. |      |      |
|-----------|-------------|-------------|----------------|------|------|--------------|-------------|----------------|------|------|
|           | #           | Target      | r1             | r2   | r3   | #            | Target      | r1             | r2   | r3   |
| <b>1</b>  | 10          | Gag 532-20  | 57.9           | 52.1 | 59.9 | 11           | Gag 532-21  | 41.3           | 36.2 | 51.4 |
| <b>2</b>  | 12          | Gag 533-20  | 30.7           | 23.8 | 29.4 | 13           | Gag 533-21  | 31.6           | 27.9 | 39.1 |
| <b>3</b>  | 14          | Gag 534-20  | 46.5           | 36.8 | 40.1 | 15           | Gag 534-21  | 43.7           | 41.9 | 49.1 |
| <b>4</b>  | 22          | Pol 248-20  | 9.0            | 7.8  | 9.7  | 23           | Pol 248-21  | 9.1            | 7.9  | 9.1  |
| <b>5</b>  | 24          | Pol 249-20  | 10.1           | 7.9  | 9.5  | 25           | Pol 249-21  | 9.0            | 8.0  | 9.1  |
| <b>6</b>  | 26          | Pol 250-20  | 11.2           | 8.6  | 9.6  | 27           | Pol 250-21  | 10.3           | 8.6  | 10.3 |
| <b>7</b>  | 43          | Pol 2878-20 | 7.9            | 8.0  | 7.2  | 44           | Pol 2878-21 | 8.6            | 7.2  | 8.2  |
| <b>8</b>  | 45          | Pol 2879-20 | 8.4            | 8.1  | 7.9  | 46           | Pol 2879-21 | 99.6           | 95.6 | 93.4 |
| <b>9</b>  | 65          | Vpu 140-20  | 34.2           | 27.1 | 30.4 | 66           | Vpu 140-21  | 27.2           | 23.0 | 23.9 |
| <b>10</b> | 69          | Vpu 144-20  | 7.4            | 5.8  | 7.0  | 70           | Vpu 144-21  | 6.5            | 5.6  | 5.8  |
| <b>11</b> | 77          | Env 1423-20 | 6.1            | 5.8  | 6.4  | 78           | Env 1423-21 | 8.1            | 7.4  | 9.5  |
| <b>12</b> | 80          | Env 1425-20 | 12.3           | 10.4 | 11.4 | 81           | Env 1425-21 | 7.5            | 6.8  | 7.3  |
| <b>13</b> | 85          | Env 1432-20 | 12.7           | 11.8 | 11.4 | 86           | Env 1432-21 | 7.2            | 6.6  | 7.9  |
| <b>14</b> | 87          | Env 1433-20 | 19.3           | 17.2 | 18.1 | 88           | Env 1433-21 | 19.0           | 18.4 | 19.3 |

## Overlapping target pairs

The **19** regions of overlapping hairpins comprised **73** adjacent pairs of hairpins where the starting position of the targets differed by 1 nt. **Forty two** of these had the same stem length (either both 20 or both 21 bp), **31** had different stem lengths. The pairs are listed in the following 2 tables grouped according to pairs with the same, and pairs with different stem lengths. The 3 replicate fluorescence values (as a % of the control) from the fluorescent reporter assays used for statistical analysis are shown.

### The 42 pairs with matched stem lengths

| Pair | First shRNA |             | Replicate % F. |       |       | Second shRNA |             | Replicate % F. |       |       |
|------|-------------|-------------|----------------|-------|-------|--------------|-------------|----------------|-------|-------|
|      | #           | Target      | r1             | r2    | r3    | #            | Target      | r1             | r2    | r3    |
| 1    | 2           | Ltr 506-20  | 66.7           | 82.4  | 68.6  | 3            | Ltr 507-20  | 73.6           | 85.9  | 77.5  |
| 2    | 10          | Gag 532-20  | 57.86          | 52.08 | 59.92 | 12           | Gag 533-20  | 30.7           | 23.8  | 29.4  |
| 3    | 11          | Gag 532-21  | 41.3           | 36.2  | 51.4  | 13           | Gag 533-21  | 31.6           | 27.9  | 39.1  |
| 4    | 12          | Gag 533-20  | 30.69          | 23.82 | 29.39 | 14           | Gag 534-20  | 46.5           | 36.8  | 40.1  |
| 5    | 13          | Gag 533-21  | 31.6           | 27.9  | 39.1  | 15           | Gag 534-21  | 43.7           | 41.9  | 49.1  |
| 6    | 14          | Gag 534-20  | 46.5           | 36.8  | 40.1  | 16           | Gag 535-20  | 42.7           | 29.6  | 34.8  |
| 7    | 20          | Pol 0246-21 | 9.1            | 7.6   | 8.5   | 21           | Pol 0247-21 | 10.0           | 9.3   | 10.6  |
| 8    | 21          | Pol 0247-21 | 10.0           | 9.3   | 10.6  | 23           | Pol 0248-21 | 9.1            | 7.9   | 9.1   |
| 9    | 22          | Pol 0248-20 | 9.0            | 7.8   | 9.7   | 24           | Pol 0249-20 | 10.1           | 7.9   | 9.5   |
| 10   | 23          | Pol 0248-21 | 9.1            | 7.9   | 9.1   | 25           | Pol 0249-21 | 9.0            | 8.0   | 9.1   |
| 11   | 24          | Pol 0249-20 | 10.1           | 7.9   | 9.5   | 26           | Pol 0250-20 | 11.2           | 8.6   | 9.6   |
| 12   | 25          | Pol 0249-21 | 9.0            | 8.0   | 9.1   | 27           | Pol 0250-21 | 10.3           | 8.6   | 10.3  |
| 13   | 26          | Pol 0250-20 | 11.2           | 8.6   | 9.6   | 28           | Pol 0251-20 | 119            | 120.9 | 135.2 |
| 14   | 32          | Pol 0925-20 | 14.1           | 15.0  | 14.6  | 33           | Pol 0926-20 | 17.3           | 23.3  | 21.6  |
| 15   | 36          | Pol 2670-21 | 9.9            | 9.3   | 9.4   | 37           | Pol 2671-21 | 10.6           | 9.3   | 10.0  |
| 16   | 41          | Pol 2873-21 | 38.3           | 40.4  | 39.5  | 42           | Pol 2874-21 | 23.2           | 19.9  | 18.2  |
| 17   | 43          | Pol 2878-20 | 7.9            | 8.0   | 7.2   | 45           | Pol 2879-20 | 8.4            | 8.1   | 7.9   |
| 18   | 44          | Pol 2878-21 | 8.6            | 7.2   | 8.2   | 46           | Pol 2879-21 | 99.6           | 95.6  | 93.4  |
| 19   | 45          | Pol 2879-20 | 8.4            | 8.1   | 7.9   | 47           | Pol 2880-20 | 29.9           | 30.9  | 27.7  |
| 20   | 48          | Pol 2881-21 | 12.2           | 12.4  | 11.8  | 49           | Pol 2882-21 | 9.6            | 8.6   | 8.3   |
| 21   | 51          | Vif 9-21    | 16.6           | 16.9  | 14.5  | 52           | Vif 10-21   | 13.9           | 12.8  | 12.0  |
| 22   | 52          | Vif 10-21   | 13.9           | 12.8  | 12.0  | 53           | Vif 11-21   | 14.2           | 14.3  | 13.5  |

| Pair | First shRNA |              | Replicate % F. |      |      | Second shRNA |              | Replicate % F. |      |      |
|------|-------------|--------------|----------------|------|------|--------------|--------------|----------------|------|------|
|      | #           | Target       | r1             | r2   | r3   | #            | Target       | r1             | r2   | r3   |
| 23   | 55          | Vif 14-21    | 16.8           | 17.5 | 15.8 | 56           | Vif 15-21    | 11.6           | 11.1 | 10.5 |
| 24   | 62          | Revx1 8-20   | 18.7           | 16.4 | 14.9 | 63           | Revx1 9-20   | 15.9           | 14.6 | 14.4 |
| 25   | 64          | Vpu 139-21   | 10.4           | 7.5  | 9.2  | 66           | Vpu 140-21   | 27.2           | 23.0 | 23.9 |
| 26   | 65          | Vpu 140-20   | 34.2           | 27.1 | 30.4 | 67           | Vpu 141-20   | 7.1            | 5.7  | 6.8  |
| 27   | 68          | Vpu 143-20   | 7.0            | 6.1  | 6.9  | 69           | Vpu 144-20   | 7.4            | 5.8  | 7.0  |
| 28   | 69          | Vpu 144-20   | 7.4            | 5.8  | 7.0  | 71           | Vpu 145-20   | 7.6            | 5.8  | 7.1  |
| 29   | 71          | Vpu 145-20   | 7.6            | 5.8  | 7.1  | 72           | Vpu 146-20   | 8.6            | 6.1  | 7.3  |
| 30   | 73          | Vpu 147-21   | 6.5            | 5.7  | 6.4  | 74           | Vpu 148-21   | 6.7            | 5.3  | 6.0  |
| 31   | 78          | Env 1423-21  | 8.1            | 7.4  | 9.5  | 79           | Env 1424-21  | 6.5            | 6.1  | 7.0  |
| 32   | 79          | Env 1424-21  | 6.5            | 6.1  | 7.0  | 81           | Env 1425-21  | 7.5            | 6.8  | 7.3  |
| 33   | 81          | Env 1425-21  | 7.5            | 6.8  | 7.3  | 82           | Env 1426-21  | 7.6            | 6.3  | 7.0  |
| 34   | 84          | Env 1431-21  | 32.2           | 22.9 | 29.2 | 86           | Env 1432-21  | 7.2            | 6.6  | 7.9  |
| 35   | 85          | Env 1432-20  | 12.7           | 11.8 | 11.4 | 87           | Env 1433-20  | 19.3           | 17.2 | 18.1 |
| 36   | 86          | Env 1432-21  | 7.2            | 6.6  | 7.9  | 88           | Env 1433-21  | 19.0           | 18.4 | 19.3 |
| 37   | 87          | Env 1433-20  | 19.3           | 17.2 | 18.1 | 89           | Env 1434-20  | 20.9           | 18.6 | 20.3 |
| 38   | 90          | Env 1436-20  | 44.0           | 41.3 | 41.4 | 91           | Env 1437-20  | 64.9           | 62.3 | 61.9 |
| 39   | 93          | Revx2 158-20 | 7.8            | 7.7  | 8.4  | 94           | Revx2 159-20 | 11.3           | 9.9  | 12.7 |
| 40   | 94          | Revx2 159-20 | 11.3           | 9.9  | 12.7 | 92           | Env 2308-20  | 20.3           | 17.1 | 18.8 |
| 41   | 95          | Nef 350-20   | 29.6           | 25.5 | 28.6 | 96           | Nef 351-20   | 37.7           | 38.9 | 38.6 |
| 42   | 96          | Nef 351-20   | 37.7           | 38.9 | 38.6 | 1            | Ltr 63-20    | 57.2           | 57.5 | 54.2 |

### The 31 pairs with mismatched stem lengths

| Pair | First shRNA |             | Replicate % F. |       |       | Second shRNA |             | Replicate % F. |      |      |
|------|-------------|-------------|----------------|-------|-------|--------------|-------------|----------------|------|------|
|      | #           | Target      | r1             | r2    | r3    | #            | Target      | r1             | r2   | r3   |
| 1    | 4           | Ltr 509-20  | 39.3           | 35.6  | 32.7  | 5            | Ltr 510-21  | 17.3           | 17.7 | 21.5 |
| 2    | 10          | Gag 532-20  | 57.86          | 52.08 | 59.92 | 13           | Gag 533-21  | 31.6           | 27.9 | 39.1 |
| 3    | 11          | Gag 532-21  | 41.3           | 36.2  | 51.4  | 12           | Gag 533-20  | 30.7           | 23.8 | 29.4 |
| 4    | 12          | Gag 533-20  | 30.7           | 23.8  | 29.4  | 15           | Gag 534-21  | 43.7           | 41.9 | 49.1 |
| 5    | 13          | Gag 533-21  | 31.6           | 27.9  | 39.1  | 14           | Gag 534-20  | 46.5           | 36.8 | 40.1 |
| 6    | 15          | Gag 534-21  | 43.7           | 41.9  | 49.1  | 16           | Gag 535-20  | 42.7           | 29.6 | 34.8 |
| 7    | 21          | Pol 0247-21 | 10.0           | 9.3   | 10.6  | 22           | Pol 0248-20 | 9.0            | 7.8  | 9.7  |
| 8    | 22          | Pol 0248-20 | 9.0            | 7.8   | 9.7   | 25           | Pol 0249-21 | 9.0            | 8.0  | 9.1  |

| Pair | First shRNA |              | Replicate % F. |      |      | Second shRNA |              | Replicate % F. |       |       |
|------|-------------|--------------|----------------|------|------|--------------|--------------|----------------|-------|-------|
|      | #           | Target       | r1             | r2   | r3   | #            | Target       | r1             | r2    | r3    |
| 9    | 23          | Pol 0248-21  | 9.1            | 7.9  | 9.1  | 24           | Pol 0249-20  | 10.1           | 7.9   | 9.5   |
| 10   | 24          | Pol 0249-20  | 10.1           | 7.9  | 9.5  | 27           | Pol 0250-21  | 10.3           | 8.6   | 10.3  |
| 11   | 25          | Pol 0249-21  | 9.0            | 8.0  | 9.1  | 26           | Pol 0250-20  | 11.2           | 8.6   | 9.6   |
| 12   | 27          | Pol 0250-21  | 10.3           | 8.6  | 10.3 | 28           | Pol 0251-20  | 119            | 120.9 | 135.2 |
| 13   | 43          | Pol 2878-20  | 7.9            | 8.0  | 7.2  | 46           | Pol 2879-21  | 99.6           | 95.6  | 93.4  |
| 14   | 44          | Pol 2878-21  | 8.6            | 7.2  | 8.2  | 45           | Pol 2879-20  | 8.4            | 8.1   | 7.9   |
| 15   | 46          | Pol 2879-21  | 99.6           | 95.6 | 93.4 | 47           | Pol 2880-20  | 29.9           | 30.9  | 27.7  |
| 16   | 47          | Pol 2880-20  | 29.9           | 30.9 | 27.7 | 48           | Pol 2881-21  | 12.2           | 12.4  | 11.8  |
| 17   | 53          | Vif 11-21    | 14.2           | 14.3 | 13.5 | 54           | Vif 12-20    | 20.5           | 25.3  | 22.8  |
| 18   | 58          | Tatx1 131-20 | 28.8           | 24.5 | 25.2 | 59           | Tatx1 132-21 | 28.2           | 27.8  | 24.4  |
| 19   | 64          | Vpu 139-21   | 10.4           | 7.5  | 9.2  | 65           | Vpu 140-20   | 34.2           | 27.1  | 30.4  |
| 20   | 66          | Vpu 140-21   | 27.2           | 23.0 | 23.9 | 67           | Vpu 141-20   | 7.1            | 5.7   | 6.8   |
| 21   | 68          | Vpu 143-20   | 7.0            | 6.1  | 6.9  | 70           | Vpu 144-21   | 6.5            | 5.6   | 5.8   |
| 22   | 70          | Vpu 144-21   | 6.5            | 5.6  | 5.8  | 71           | Vpu 145-20   | 7.6            | 5.8   | 7.1   |
| 23   | 72          | Vpu 146-20   | 8.6            | 6.1  | 7.3  | 73           | Vpu 147-21   | 6.5            | 5.7   | 6.4   |
| 24   | 74          | Vpu 148-21   | 6.7            | 5.3  | 6.0  | 75           | Vpu 149-20   | 8.9            | 6.8   | 7.6   |
| 25   | 77          | Env 1423-20  | 6.1            | 5.8  | 6.4  | 79           | Env 1424-21  | 6.5            | 6.1   | 7.0   |
| 26   | 79          | Env 1424-21  | 6.5            | 6.1  | 7.0  | 80           | Env 1425-20  | 12.3           | 10.4  | 11.4  |
| 27   | 80          | Env 1425-20  | 12.3           | 10.4 | 11.4 | 82           | Env 1426-21  | 7.6            | 6.3   | 7.0   |
| 28   | 84          | Env 1431-21  | 32.2           | 22.9 | 29.2 | 85           | Env 1432-20  | 12.7           | 11.8  | 11.4  |
| 29   | 85          | Env 1432-20  | 12.7           | 11.8 | 11.4 | 88           | Env 1433-21  | 19.0           | 18.4  | 19.3  |
| 30   | 86          | Env 1432-21  | 7.2            | 6.6  | 7.9  | 87           | Env 1433-20  | 19.3           | 17.2  | 18.1  |
| 31   | 88          | Env 1433-21  | 19.0           | 18.4 | 19.3 | 89           | Env 1434-20  | 20.9           | 18.6  | 20.3  |

## Detailed conservation profiles

The following table shows the detailed conservation profiles for the **96** selected targets. Conservations were calculated for LANL and Virco sequences combined, LANL clade B subtypes only, and the Virco sequences only (where applicable). In each group, 6 conservations are given: the conservation for the entire overlapping 23 mer region, and the 5 individual conservations for the 5 overlapping 19 mers that make up the 23 mer profile region. Some of shRNAs were matched to more than 1 gene, however, conservations were only estimated using a single gene data set (corresponding to the shRNA / target name), e.g. hairpin cores 1, 95, and 96 were slightly higher conserved in the Nef data set rather than the LTR data set (LTR conservations shown).

| #  | Target     | LANL + Virco (all) |    |    |           |    |    | LANL clade B |     |     |            |     |     | Virco (all) |    |    |           |    |    |
|----|------------|--------------------|----|----|-----------|----|----|--------------|-----|-----|------------|-----|-----|-------------|----|----|-----------|----|----|
|    |            | 23                 | -2 | -1 | p0        | +1 | +2 | 23           | -2  | -1  | p0         | +1  | +2  | 23          | -2 | -1 | p0        | +1 | +2 |
| 1  | LTR 63-20  | 32                 | 34 | 32 | <b>33</b> | 33 | 33 | 73           | 78  | 75  | <b>76</b>  | 75  | 75  | 39          | 44 | 39 | <b>40</b> | 40 | 40 |
| 2  | LTR 506-20 | 50                 | 51 | 64 | <b>67</b> | 69 | 69 | 97           | 97  | 97  | <b>97</b>  | 98  | 100 | -           | -  | -  | -         | -  | -  |
| 3  | LTR 507-20 | 64                 | 64 | 67 | <b>69</b> | 69 | 69 | 97           | 97  | 97  | <b>98</b>  | 100 | 100 | -           | -  | -  | -         | -  | -  |
| 4  | LTR 509-20 | 69                 | 69 | 69 | <b>69</b> | 70 | 71 | 98           | 98  | 100 | <b>100</b> | 100 | 100 | -           | -  | -  | -         | -  | -  |
| 5  | LTR 510-21 | 69                 | 69 | 69 | <b>70</b> | 71 | 71 | 100          | 100 | 100 | <b>100</b> | 100 | 100 | -           | -  | -  | -         | -  | -  |
| 6  | LTR 516-21 | 71                 | 71 | 71 | <b>71</b> | 71 | 71 | 100          | 100 | 100 | <b>100</b> | 100 | 100 | -           | -  | -  | -         | -  | -  |
| 7  | LTR 522-20 | 90                 | 93 | 91 | <b>92</b> | 92 | 93 | 100          | 100 | 100 | <b>100</b> | 100 | 100 | -           | -  | -  | -         | -  | -  |
| 8  | LTR 527-21 | 90                 | 93 | 93 | <b>93</b> | 93 | 91 | 100          | 100 | 100 | <b>100</b> | 100 | 100 | -           | -  | -  | -         | -  | -  |
| 9  | LTR 553-20 | 48                 | 51 | 52 | <b>51</b> | 50 | 50 | 90           | 94  | 92  | <b>92</b>  | 92  | 90  | -           | -  | -  | -         | -  | -  |
| 10 | Gag 532-20 | 58                 | 64 | 62 | <b>70</b> | 70 | 69 | 77           | 79  | 78  | <b>80</b>  | 80  | 80  | -           | -  | -  | -         | -  | -  |
| 11 | Gag 532-21 | 58                 | 64 | 62 | <b>70</b> | 70 | 69 | 77           | 79  | 78  | <b>80</b>  | 80  | 80  | -           | -  | -  | -         | -  | -  |
| 12 | Gag 533-20 | 58                 | 62 | 70 | <b>70</b> | 69 | 71 | 77           | 78  | 80  | <b>80</b>  | 80  | 82  | -           | -  | -  | -         | -  | -  |
| 13 | Gag 533-21 | 58                 | 62 | 70 | <b>70</b> | 69 | 71 | 77           | 78  | 80  | <b>80</b>  | 80  | 82  | -           | -  | -  | -         | -  | -  |
| 14 | Gag 534-20 | 68                 | 70 | 70 | <b>69</b> | 71 | 71 | 79           | 80  | 80  | <b>80</b>  | 82  | 82  | -           | -  | -  | -         | -  | -  |
| 15 | Gag 534-21 | 68                 | 70 | 70 | <b>69</b> | 71 | 71 | 79           | 80  | 80  | <b>80</b>  | 82  | 82  | -           | -  | -  | -         | -  | -  |
| 16 | Gag 535-20 | 16                 | 70 | 69 | <b>71</b> | 71 | 16 | 6            | 80  | 80  | <b>82</b>  | 82  | 6   | -           | -  | -  | -         | -  | -  |
| 17 | Gag 578-20 | 55                 | 62 | 63 | <b>63</b> | 57 | 58 | 72           | 78  | 79  | <b>79</b>  | 73  | 73  | -           | -  | -  | -         | -  | -  |
| 18 | Gag 698-20 | 67                 | 74 | 71 | <b>70</b> | 68 | 69 | 74           | 78  | 78  | <b>76</b>  | 75  | 75  | -           | -  | -  | -         | -  | -  |
| 19 | Pol 242-20 | 57                 | 58 | 58 | <b>58</b> | 57 | 83 | 76           | 77  | 77  | <b>77</b>  | 77  | 84  | -           | -  | -  | -         | -  | -  |
| 20 | Pol 246-21 | 76                 | 83 | 83 | <b>80</b> | 80 | 80 | 78           | 84  | 84  | <b>81</b>  | 87  | 87  | -           | -  | -  | -         | -  | -  |
| 21 | Pol 247-21 | 75                 | 83 | 80 | <b>80</b> | 80 | 79 | 77           | 84  | 81  | <b>87</b>  | 87  | 86  | -           | -  | -  | -         | -  | -  |

| #  | Target      | LANL + Virco (all) |    |    |    |    | LANL clade B |    |    |    |    | Virco (all) |    |    |    |    |    |    |    |
|----|-------------|--------------------|----|----|----|----|--------------|----|----|----|----|-------------|----|----|----|----|----|----|----|
|    |             | 23                 | -2 | -1 | p0 | +1 | +2           | 23 | -2 | -1 | p0 | +1          | +2 | 23 | -2 | -1 | p0 | +1 | +2 |
| 22 | Pol 248-20  | 75                 | 80 | 80 | 80 | 79 | 80           | 77 | 81 | 87 | 87 | 86          | 87 | -  | -  | -  | -  | -  | -  |
| 23 | Pol 248-21  | 75                 | 80 | 80 | 80 | 79 | 80           | 77 | 81 | 87 | 87 | 86          | 87 | -  | -  | -  | -  | -  | -  |
| 24 | Pol 249-20  | 78                 | 80 | 80 | 79 | 80 | 80           | 85 | 87 | 87 | 86 | 87          | 87 | -  | -  | -  | -  | -  | -  |
| 25 | Pol 249-21  | 78                 | 80 | 80 | 79 | 80 | 80           | 85 | 87 | 87 | 86 | 87          | 87 | -  | -  | -  | -  | -  | -  |
| 26 | Pol 250-20  | 77                 | 80 | 79 | 80 | 80 | 79           | 85 | 87 | 86 | 87 | 87          | 87 | -  | -  | -  | -  | -  | -  |
| 27 | Pol 250-21  | 77                 | 80 | 79 | 80 | 80 | 79           | 85 | 87 | 86 | 87 | 87          | 87 | -  | -  | -  | -  | -  | -  |
| 28 | Pol 251-20  | 75                 | 79 | 80 | 80 | 79 | 78           | 85 | 86 | 87 | 87 | 87          | 86 | -  | -  | -  | -  | -  | -  |
| 29 | Pol 404-20  | 57                 | 58 | 67 | 67 | 67 | 70           | 64 | 64 | 65 | 65 | 65          | 68 | -  | -  | -  | -  | -  | -  |
| 30 | Pol 529-21  | 62                 | 64 | 64 | 68 | 68 | 66           | 78 | 80 | 80 | 84 | 84          | 81 | -  | -  | -  | -  | -  | -  |
| 31 | Pol 921-20  | 58                 | 60 | 60 | 58 | 61 | 61           | 75 | 78 | 78 | 76 | 79          | 78 | -  | -  | -  | -  | -  | -  |
| 32 | Pol 925-20  | 50                 | 61 | 60 | 60 | 60 | 51           | 72 | 78 | 77 | 77 | 77          | 73 | -  | -  | -  | -  | -  | -  |
| 33 | Pol 926-20  | 50                 | 60 | 60 | 60 | 51 | 53           | 72 | 77 | 77 | 77 | 73          | 74 | -  | -  | -  | -  | -  | -  |
| 34 | Pol 1161-20 | 32                 | 36 | 34 | 32 | 32 | 32           | 75 | 77 | 77 | 75 | 75          | 76 | -  | -  | -  | -  | -  | -  |
| 35 | Pol 2668-21 | 72                 | 82 | 79 | 78 | 78 | 73           | 73 | 87 | 85 | 84 | 84          | 74 | -  | -  | -  | -  | -  | -  |
| 36 | Pol 2670-21 | 72                 | 78 | 78 | 73 | 73 | 74           | 73 | 84 | 84 | 74 | 74          | 74 | -  | -  | -  | -  | -  | -  |
| 37 | Pol 2671-21 | 22                 | 78 | 73 | 73 | 74 | 22           | 57 | 84 | 74 | 74 | 74          | 57 | -  | -  | -  | -  | -  | -  |
| 38 | Pol 2724-20 | 69                 | 70 | 71 | 71 | 81 | 81           | 62 | 63 | 63 | 67 | 86          | 86 | -  | -  | -  | -  | -  | -  |
| 39 | Pol 2726-21 | 14                 | 71 | 81 | 81 | 79 | 18           | 41 | 67 | 86 | 86 | 82          | 50 | -  | -  | -  | -  | -  | -  |
| 40 | Pol 2750-20 | 65                 | 66 | 65 | 65 | 65 | 70           | 74 | 75 | 75 | 75 | 74          | 77 | -  | -  | -  | -  | -  | -  |
| 41 | Pol 2873-21 | 77                 | 82 | 88 | 88 | 85 | 84           | 80 | 84 | 95 | 95 | 93          | 91 | -  | -  | -  | -  | -  | -  |
| 42 | Pol 2874-21 | 84                 | 88 | 88 | 85 | 84 | 84           | 91 | 95 | 95 | 93 | 91          | 91 | -  | -  | -  | -  | -  | -  |
| 43 | Pol 2878-20 | 74                 | 84 | 76 | 74 | 74 | 74           | 79 | 91 | 80 | 80 | 79          | 79 | -  | -  | -  | -  | -  | -  |
| 44 | Pol 2878-21 | 74                 | 84 | 76 | 74 | 74 | 74           | 79 | 91 | 80 | 80 | 79          | 79 | -  | -  | -  | -  | -  | -  |
| 45 | Pol 2879-20 | 73                 | 76 | 74 | 74 | 74 | 74           | 79 | 80 | 80 | 79 | 79          | 80 | -  | -  | -  | -  | -  | -  |
| 46 | Pol 2879-21 | 73                 | 76 | 74 | 74 | 74 | 74           | 79 | 80 | 80 | 79 | 79          | 80 | -  | -  | -  | -  | -  | -  |
| 47 | Pol 2880-20 | 74                 | 74 | 74 | 74 | 74 | 74           | 79 | 80 | 79 | 79 | 80          | 80 | -  | -  | -  | -  | -  | -  |
| 48 | Pol 2881-21 | 63                 | 74 | 74 | 74 | 74 | 64           | 78 | 79 | 79 | 80 | 80          | 79 | -  | -  | -  | -  | -  | -  |
| 49 | Pol 2882-21 | 63                 | 74 | 74 | 74 | 64 | 64           | 78 | 79 | 80 | 80 | 79          | 79 | -  | -  | -  | -  | -  | -  |
| 50 | Pol 2885-20 | 39                 | 64 | 64 | 64 | 40 | 42           | 67 | 79 | 79 | 79 | 67          | 68 | -  | -  | -  | -  | -  | -  |
| 51 | Vif 9-21    | 71                 | 71 | 71 | 71 | 71 | 71           | 91 | 91 | 91 | 92 | 92          | 92 | 74 | 75 | 75 | 74 | 74 | 74 |
| 52 | Vif 10-21   | 69                 | 71 | 71 | 71 | 71 | 70           | 88 | 91 | 92 | 92 | 92          | 89 | 74 | 75 | 74 | 74 | 74 | 75 |
| 53 | Vif 11-21   | 69                 | 71 | 71 | 71 | 70 | 70           | 88 | 92 | 92 | 92 | 89          | 90 | 74 | 74 | 74 | 74 | 75 | 76 |
| 54 | Vif 12-20   | 69                 | 71 | 71 | 70 | 70 | 70           | 88 | 92 | 92 | 89 | 90          | 90 | 74 | 74 | 74 | 75 | 76 | 76 |
| 55 | Vif 14-21   | 69                 | 70 | 70 | 70 | 70 | 70           | 89 | 89 | 90 | 90 | 90          | 90 | 75 | 75 | 76 | 76 | 76 | 76 |

| #  | Target          | LANL + Virco (all) |    |    |    |    | LANL clade B |    |    |    |    | Virco (all) |    |    |    |    |    |    |    |
|----|-----------------|--------------------|----|----|----|----|--------------|----|----|----|----|-------------|----|----|----|----|----|----|----|
|    |                 | 23                 | -2 | -1 | p0 | +1 | +2           | 23 | -2 | -1 | p0 | +1          | +2 | 23 | -2 | -1 | p0 | +1 | +2 |
| 56 | Vif 15-21       | 70                 | 70 | 70 | 70 | 70 | 70           | 89 | 90 | 90 | 90 | 90          | 90 | 76 | 76 | 76 | 76 | 76 | 76 |
| 57 | Vif 37-20       | 2                  | 45 | 43 | 71 | 13 | 4            | 3  | 76 | 75 | 87 | 17          | 6  | 2  | 36 | 35 | 67 | 18 | 3  |
| 58 | Tat (x1) 131-20 | 68                 | 68 | 68 | 68 | 68 | 70           | 83 | 84 | 84 | 84 | 84          | 85 | 57 | 58 | 58 | 57 | 57 | 57 |
| 59 | Tat (x1) 132-21 | 68                 | 68 | 68 | 68 | 70 | 70           | 84 | 84 | 84 | 84 | 85          | 86 | 57 | 58 | 57 | 57 | 57 | 58 |
| 60 | Tat (x1) 140-21 | 68                 | 81 | 82 | 73 | 72 | 72           | 73 | 79 | 78 | 77 | 75          | 75 | 62 | 77 | 80 | 77 | 74 | 73 |
| 61 | Tat (x1) 143-21 | 60                 | 72 | 68 | 62 | 60 | 60           | 68 | 75 | 74 | 70 | 68          | 68 | 57 | 73 | 66 | 58 | 58 | 57 |
| 62 | Tat (x1) 147-20 | 59                 | 60 | 60 | 60 | 59 | 59           | 67 | 68 | 68 | 68 | 67          | 67 | 54 | 58 | 57 | 57 | 56 | 54 |
| 63 | Rev (x1) 9-20   | 57                 | 61 | 60 | 60 | 59 | 58           | 66 | 68 | 68 | 68 | 67          | 66 | 52 | 57 | 57 | 56 | 54 | 53 |
| 64 | Vpu 139-21      | 6                  | 6  | 44 | 64 | 64 | 56           | 12 | 12 | 70 | 77 | 78          | 72 | 6  | 6  | 49 | 76 | 76 | 66 |
| 65 | Vpu 140-20      | 36                 | 44 | 64 | 64 | 56 | 65           | 65 | 70 | 77 | 78 | 72          | 82 | 40 | 49 | 76 | 76 | 66 | 69 |
| 66 | Vpu 140-21      | 36                 | 44 | 64 | 64 | 56 | 65           | 65 | 70 | 77 | 78 | 72          | 82 | 40 | 49 | 76 | 76 | 66 | 69 |
| 67 | Vpu 141-20      | 55                 | 64 | 64 | 56 | 65 | 66           | 72 | 77 | 78 | 72 | 82          | 83 | 66 | 76 | 76 | 66 | 69 | 69 |
| 68 | Vpu 143-20      | 55                 | 56 | 65 | 66 | 65 | 66           | 72 | 72 | 82 | 83 | 83          | 83 | 65 | 66 | 69 | 69 | 68 | 69 |
| 69 | Vpu 144-20      | 65                 | 65 | 66 | 65 | 66 | 67           | 82 | 82 | 83 | 83 | 83          | 84 | 68 | 69 | 69 | 68 | 69 | 73 |
| 70 | Vpu 144-21      | 65                 | 65 | 66 | 65 | 66 | 67           | 82 | 82 | 83 | 83 | 83          | 84 | 68 | 69 | 69 | 68 | 69 | 73 |
| 71 | Vpu 145-20      | 49                 | 66 | 65 | 66 | 67 | 53           | 60 | 83 | 83 | 83 | 84          | 63 | 56 | 69 | 68 | 69 | 73 | 61 |
| 72 | Vpu 146-20      | 48                 | 65 | 66 | 67 | 53 | 53           | 59 | 83 | 83 | 84 | 63          | 62 | 56 | 68 | 69 | 73 | 61 | 61 |
| 73 | Vpu 147-21      | 50                 | 66 | 67 | 53 | 53 | 53           | 60 | 83 | 84 | 63 | 62          | 62 | 56 | 69 | 73 | 61 | 61 | 61 |
| 74 | Vpu 148-21      | 46                 | 67 | 53 | 53 | 53 | 49           | 55 | 84 | 63 | 62 | 62          | 56 | 48 | 73 | 61 | 61 | 61 | 50 |
| 75 | Vpu 149-20      | 48                 | 53 | 53 | 53 | 49 | 49           | 56 | 63 | 62 | 62 | 56          | 57 | 50 | 61 | 61 | 61 | 50 | 53 |
| 76 | Env 628-20      | 45                 | 46 | 46 | 61 | 61 | 60           | 63 | 64 | 65 | 85 | 85          | 84 | -  | -  | -  | -  | -  | -  |
| 77 | Env 1423-20     | 48                 | 53 | 67 | 72 | 74 | 74           | 60 | 66 | 73 | 76 | 77          | 77 | -  | -  | -  | -  | -  | -  |
| 78 | Env 1423-21     | 48                 | 53 | 67 | 72 | 74 | 74           | 60 | 66 | 73 | 76 | 77          | 77 | -  | -  | -  | -  | -  | -  |
| 79 | Env 1424-21     | 63                 | 67 | 72 | 74 | 74 | 79           | 70 | 73 | 76 | 77 | 77          | 84 | -  | -  | -  | -  | -  | -  |
| 80 | Env 1425-20     | 71                 | 72 | 74 | 74 | 79 | 79           | 75 | 76 | 77 | 77 | 84          | 84 | -  | -  | -  | -  | -  | -  |
| 81 | Env 1425-21     | 71                 | 72 | 74 | 74 | 79 | 79           | 75 | 76 | 77 | 77 | 84          | 84 | -  | -  | -  | -  | -  | -  |
| 82 | Env 1426-21     | 67                 | 74 | 74 | 79 | 79 | 73           | 75 | 77 | 77 | 84 | 84          | 81 | -  | -  | -  | -  | -  | -  |
| 83 | Env 1428-21     | 72                 | 79 | 79 | 73 | 75 | 75           | 80 | 84 | 84 | 81 | 82          | 82 | -  | -  | -  | -  | -  | -  |
| 84 | Env 1431-21     | 65                 | 75 | 75 | 65 | 65 | 65           | 80 | 82 | 82 | 81 | 81          | 81 | -  | -  | -  | -  | -  | -  |
| 85 | Env 1432-20     | 62                 | 75 | 65 | 65 | 65 | 63           | 78 | 82 | 81 | 81 | 81          | 79 | -  | -  | -  | -  | -  | -  |
| 86 | Env 1432-21     | 62                 | 75 | 65 | 65 | 65 | 63           | 78 | 82 | 81 | 81 | 81          | 79 | -  | -  | -  | -  | -  | -  |
| 87 | Env 1433-20     | 62                 | 65 | 65 | 65 | 63 | 64           | 78 | 81 | 81 | 81 | 79          | 80 | -  | -  | -  | -  | -  | -  |
| 88 | Env 1433-21     | 62                 | 65 | 65 | 65 | 63 | 64           | 78 | 81 | 81 | 81 | 79          | 80 | -  | -  | -  | -  | -  | -  |
| 89 | Env 1434-20     | 62                 | 65 | 65 | 63 | 64 | 64           | 78 | 81 | 81 | 79 | 80          | 80 | -  | -  | -  | -  | -  | -  |



| #                      | Target          | LANL + Virco (all) |    |    |           |    | LANL clade B |    |    |    |           | Virco (all) |    |    |    |    |           |    |    |
|------------------------|-----------------|--------------------|----|----|-----------|----|--------------|----|----|----|-----------|-------------|----|----|----|----|-----------|----|----|
|                        |                 | 23                 | -2 | -1 | p0        | +1 | +2           | 23 | -2 | -1 | p0        | +1          | +2 | 23 | -2 | -1 | p0        | +1 | +2 |
| 90                     | Env 1436-20     | 61                 | 63 | 64 | <b>64</b> | 66 | 66           | 78 | 79 | 80 | <b>80</b> | 83          | 83 | -  | -  | -  | -         | -  | -  |
| 91                     | Env 1437-20     | 62                 | 64 | 64 | <b>66</b> | 66 | 67           | 79 | 80 | 80 | <b>83</b> | 83          | 83 | -  | -  | -  | -         | -  | -  |
| 92                     | Env 2308-20     | 27                 | 44 | 43 | <b>43</b> | 37 | 28           | 48 | 76 | 75 | <b>74</b> | 66          | 49 | -  | -  | -  | -         | -  | -  |
| 93                     | Rev (x2) 158-20 | 44                 | 47 | 49 | <b>48</b> | 48 | 46           | 69 | 74 | 77 | <b>76</b> | 75          | 72 | 32 | 33 | 38 | <b>38</b> | 38 | 37 |
| 94                     | Rev (x2) 159-20 | 39                 | 49 | 48 | <b>48</b> | 46 | 40           | 64 | 77 | 76 | <b>75</b> | 72          | 65 | 21 | 38 | 38 | <b>38</b> | 37 | 21 |
| 95                     | Nef 350-20      | 47                 | 50 | 51 | <b>51</b> | 49 | 49           | 60 | 63 | 64 | <b>64</b> | 62          | 62 | 36 | 40 | 44 | <b>44</b> | 39 | 40 |
| 96                     | Nef 351-20      | 48                 | 51 | 51 | <b>49</b> | 49 | 49           | 61 | 64 | 64 | <b>62</b> | 62          | 62 | 39 | 44 | 44 | <b>39</b> | 40 | 40 |
| <b>Average 96:</b>     |                 | 59                 | 66 | 68 | 68        | 67 | 65           | 74 | 80 | 81 | 81        | 80          | 78 | 52 | 60 | 63 | 63        | 60 | 59 |
| <b>Virco equiv. *:</b> |                 | 52                 | 59 | 61 | 62        | 59 | 58           | 68 | 77 | 79 | 78        | 74          | 73 | 52 | 60 | 63 | 63        | 60 | 59 |

\* *Virco equiv.* = *Virco equivalent sequences*

## Reporter lengths and average activities

Two groups of fluorescent reporters were used in this study. The 'original' reporters made up of GFP fusions to each of the full length HIV genes. The accessory gene reporters were classified as short reporters given their relative shorter lengths compared to the the 3 core genes, which were classified as long reporters. A second group of reporters was for the long core reporters, consisting of shorter fragments spanning overlapping regions of each core gene and containing only that sequence targeted. The following table summarizes each reporter including its length and the average % fluorescence (**A. %F**) of all the shRNAs measured with each reporter. Also shown for the second group of shortened core reporters is the original average % fluorescence of the corresponding shRNA subset (**Cs. A. %F**), i.e. the average % fluorescence (and shRNA #s) for the subset of shRNAs tested with the original long reporters corresponding to each shortened fragment reporter. The last column contains the combined average % fluorescence (**C. A. %F**), that is, the activities measured from the group 1 accessory gene reporters and the group 2 shortened core gene reporters, tallied to a combined average at the bottom.

| Rep.                       | Length | A. %F.       | Cs. A. %F.   | Shortened Rep.      | Length | A. %F.       | C. A. %F.    |
|----------------------------|--------|--------------|--------------|---------------------|--------|--------------|--------------|
| Gag                        | 1503   | 38.38%       | -            |                     |        |              | -            |
| subset #10 - #18           |        | -            | 39%          | Gag-1 (500 - 1150)  | 650    | 37%          | 37%          |
| Pol                        | 3012   | 41.64%       | -            |                     |        |              | -            |
| subset #19 - #29           |        | -            | 41%          | Pol-1 (1 - 436)     | 436    | 21%          | 21%          |
| subset #30                 |        | -            | 58%          | Pol-2 (400 - 850)   | 450    | 51%          | 51%          |
| subset #31 - #34           |        | -            | 41%          | Pol-3 (800 - 1250)  | 450    | 20%          | 20%          |
| subset #35 - #57           |        | -            | 42%          | Pol-4 (2600 - 3025) | 425    | 27%          | 27%          |
| Tat (x1-2)                 | 258    | 18.92%       | -            |                     |        |              | 19%          |
| Rev (x1-2)                 | 272    | 12.73%       | -            |                     |        |              | 13%          |
| Vpu                        | 243    | 10.32%       | -            |                     |        |              | 10%          |
| Env                        | 2250   | 52.20%       | -            |                     |        |              | -            |
| subset #77- #91            |        | -            | 53%          | Env-1 (1300 - 1740) | 440    | 18%          | 18%          |
| <b>Nef-LTR *</b>           | 921    | 44.36%       |              |                     |        |              | 46%          |
| <b>Combined averages :</b> |        | <b>37.2%</b> | <b>43.8%</b> |                     |        | <b>25.0%</b> | <b>24.9%</b> |

\* this may be ~ 100 bp shorter than intended due to an internal transcription termination signal within the LTR sequence.

## Ranked selection

We created a scoring method to rank the 96 hairpins for overall performance based on their suppressive activities, non-specific activities and percentage conservations. Each parameter was weighted approximately equally and was awarded a score out of 100 (nb. changing the weighting for any parameter will change the following ranking). Suppressive activities from both assays were tallied as 100 minus the percentage fluorescence value or percentage p24 graphed. Non-specific activity was awarded a top score of 100 for no activity (a normalization factor of 1.0), which was reduced accordingly for increased non-specific activity, e.g. a normalization factor of 1.2 (0.2 fold enhancement) or 0.8 (0.2 fold reduction) was only awarded 80, and so on. The percentage conservations for all strains and the clade B subtypes were also tallied, but only using the p0 position. The top ranking hairpin for each gene is shown in bold. The hairpins sorted in ranked order according to score (the last column, **Rk.**). The original values and the scores for each parameter are shown.

| #  | Target                 | %F.  |      | % p24 |      | Non sp. |     | % cons. ALL (p0) |     | % cons. B (p0) |     | C.s. | Rk. |
|----|------------------------|------|------|-------|------|---------|-----|------------------|-----|----------------|-----|------|-----|
|    |                        | Val. | Sc.  | Val.  | Sc.  | Val.    | Sc. | Val.             | Sc. | Val.           | Sc. |      |     |
| 5  | <b>LTR 510-21</b>      | 18.7 | 81.3 | 1.1   | 98.9 | 1.3     | 70  | 70               | 70  | 100            | 100 | 420  | 1   |
| 8  | LTR 527-21             | 23.9 | 76.1 | 3.9   | 96.1 | 1.5     | 50  | 93               | 93  | 100            | 100 | 415  | 2   |
| 4  | LTR 509-20             | 35.5 | 64.5 | 8.5   | 91.5 | 1.2     | 80  | 69               | 69  | 100            | 100 | 405  | 3   |
| 83 | <b>Env 1428-21</b>     | 7.3  | 92.7 | 6.3   | 93.8 | 1.4     | 60  | 73               | 73  | 81             | 81  | 401  | 4   |
| 58 | <b>Tat (x1) 131-20</b> | 26.3 | 73.7 | 16.5  | 83.5 | 1.1     | 90  | 68               | 68  | 84             | 84  | 399  | 5   |
| 59 | Tat (x1) 132-21        | 26.8 | 73.2 | 26.2  | 73.8 | 1.0     | 100 | 68               | 68  | 84             | 84  | 399  | 6   |
| 81 | Env 1425-21            | 7.2  | 92.8 | 6.2   | 93.9 | 1.4     | 60  | 74               | 74  | 77             | 77  | 398  | 7   |
| 82 | Env 1426-21            | 6.9  | 93.1 | 4.3   | 95.7 | 1.7     | 30  | 79               | 79  | 84             | 84  | 382  | 8   |
| 6  | LTR 516-21             | 14.1 | 85.9 | 0.6   | 99.4 | 1.9     | 10  | 71               | 71  | 100            | 100 | 366  | 9   |
| 11 | <b>Gag 532-21</b>      | 40.7 | 59.3 | 4.9   | 95.1 | 1.4     | 60  | 70               | 70  | 80             | 80  | 364  | 10  |
| 79 | Env 1424-21            | 6.5  | 93.5 | 10.7  | 89.3 | 1.7     | 30  | 74               | 74  | 77             | 77  | 364  | 11  |
| 7  | LTR 522-20             | 61.0 | 39.0 | 47.4  | 52.6 | 1.2     | 80  | 92               | 92  | 100            | 100 | 364  | 12  |
| 68 | <b>Vpu 143-20</b>      | 6.7  | 93.3 | 10.1  | 89.9 | 1.7     | 30  | 66               | 66  | 83             | 83  | 362  | 13  |
| 80 | Env 1425-20            | 11.3 | 88.7 | 21.5  | 78.6 | 1.6     | 40  | 74               | 74  | 77             | 77  | 358  | 14  |
| 23 | <b>Pol 248-21</b>      | 8.8  | 91.2 | 0.3   | 99.7 | 3.1     | 0   | 80               | 80  | 87             | 87  | 358  | 15  |
| 22 | Pol 248-20             | 8.9  | 91.1 | 0.5   | 99.5 | 2.2     | 0   | 80               | 80  | 87             | 87  | 358  | 16  |
| 39 | Pol 2726-21            | 15.4 | 84.6 | 4.5   | 95.5 | 1.9     | 10  | 81               | 81  | 86             | 86  | 357  | 17  |
| 25 | Pol 249-21             | 8.8  | 91.2 | 0.5   | 99.5 | 2.7     | 0   | 79               | 79  | 86             | 86  | 356  | 18  |

| #  | Target           | %F.  |      | % p24 |      | Non sp. |     | % cons. ALL (p0) |     | % cons. B (p0) |     | C.s. | Rk. |
|----|------------------|------|------|-------|------|---------|-----|------------------|-----|----------------|-----|------|-----|
|    |                  | Val. | Sc.  | Val.  | Sc.  | Val.    | Sc. | Val.             | Sc. | Val.           | Sc. |      |     |
| 27 | Pol 250-21       | 9.8  | 90.2 | 1.7   | 98.3 | 2.8     | 0   | 80               | 80  | 87             | 87  | 356  | 19  |
| 62 | Tat (x1) 147-20  | 17.0 | 83.0 | 5.7   | 94.3 | 1.5     | 50  | 60               | 60  | 68             | 68  | 355  | 20  |
| 26 | Pol 250-20       | 9.8  | 90.2 | 2.0   | 98.0 | 2.5     | 0   | 80               | 80  | 87             | 87  | 355  | 21  |
| 24 | Pol 249-20       | 9.2  | 90.8 | 1.0   | 99.0 | 3.3     | 0   | 79               | 79  | 86             | 86  | 355  | 22  |
| 37 | Pol 2671-21      | 9.9  | 90.1 | 2.7   | 97.3 | 1.8     | 20  | 73               | 73  | 74             | 74  | 354  | 23  |
| 21 | Pol 247-21       | 10.0 | 90.0 | 2.7   | 97.3 | 3.0     | 0   | 80               | 80  | 87             | 87  | 354  | 24  |
| 20 | Pol 246-21       | 8.5  | 91.5 | 0.5   | 99.5 | 4.2     | 0   | 80               | 80  | 81             | 81  | 352  | 25  |
| 38 | Pol 2724-20      | 13.8 | 86.2 | 4.3   | 95.7 | 1.7     | 30  | 71               | 71  | 67             | 67  | 350  | 26  |
| 29 | Pol 404-20       | 23.8 | 76.2 | 38.7  | 61.3 | 0.8     | 80  | 67               | 67  | 65             | 65  | 350  | 27  |
| 64 | Vpu 139-21       | 8.9  | 91.1 | 15.0  | 85.0 | 1.7     | 30  | 64               | 64  | 77             | 77  | 347  | 28  |
| 44 | Pol 2878-21      | 8.0  | 92.0 | 1.5   | 98.5 | 2.6     | 0   | 74               | 74  | 80             | 80  | 345  | 29  |
| 43 | Pol 2878-20      | 7.6  | 92.4 | 2.5   | 97.5 | 2.6     | 0   | 74               | 74  | 80             | 80  | 344  | 30  |
| 45 | Pol 2879-20      | 8.1  | 91.9 | 1.2   | 98.8 | 2.1     | 0   | 74               | 74  | 79             | 79  | 344  | 31  |
| 57 | <b>Vif 37-20</b> | 9.5  | 90.5 | 4.9   | 95.1 | 2.7     | 0   | 71               | 71  | 87             | 87  | 344  | 32  |
| 52 | Vif 10-21        | 11.0 | 89.0 | 9.7   | 90.3 | 7.2     | 0   | 71               | 71  | 92             | 92  | 342  | 33  |
| 42 | Pol 2874-21      | 20.3 | 79.7 | 15.8  | 84.2 | 3.1     | 0   | 85               | 85  | 93             | 93  | 342  | 34  |
| 49 | Pol 2882-21      | 8.8  | 91.2 | 3.5   | 96.5 | 3.4     | 0   | 74               | 74  | 80             | 80  | 342  | 35  |
| 35 | Pol 2668-21      | 17.1 | 82.9 | 4.8   | 95.2 | 2.6     | 0   | 78               | 78  | 84             | 84  | 340  | 36  |
| 53 | Vif 11-21        | 15.7 | 84.3 | 9.4   | 90.6 | 3.4     | 0   | 71               | 71  | 92             | 92  | 338  | 37  |
| 48 | Pol 2881-21      | 12.1 | 87.9 | 5.7   | 94.3 | 3.1     | 0   | 74               | 74  | 80             | 80  | 336  | 38  |
| 36 | Pol 2670-21      | 9.5  | 90.5 | 2.0   | 98.0 | 2.0     | 0   | 73               | 73  | 74             | 74  | 336  | 39  |
| 71 | Vpu 145-20       | 6.8  | 93.2 | 7.7   | 92.3 | 2.6     | 0   | 66               | 66  | 83             | 83  | 335  | 40  |
| 13 | Gag 533-21       | 31.1 | 68.9 | 5.2   | 94.8 | 1.8     | 20  | 70               | 70  | 80             | 80  | 334  | 41  |
| 72 | Vpu 146-20       | 7.3  | 92.7 | 11.7  | 88.3 | 2.1     | 0   | 67               | 67  | 84             | 84  | 332  | 42  |
| 77 | Env 1423-20      | 6.1  | 93.9 | 10.2  | 89.9 | 3.0     | 0   | 72               | 72  | 76             | 76  | 332  | 43  |
| 46 | Pol 2879-21      | 95.8 | 4.2  | 15.7  | 84.3 | 1.1     | 90  | 74               | 74  | 79             | 79  | 332  | 44  |
| 56 | Vif 15-21        | 22.6 | 77.4 | 6.4   | 93.6 | 2.8     | 0   | 70               | 70  | 90             | 90  | 331  | 45  |
| 55 | Vif 14-21        | 13.9 | 86.1 | 15.6  | 84.4 | 4.5     | 0   | 70               | 70  | 90             | 90  | 331  | 46  |
| 17 | Gag 578-20       | 35.3 | 64.7 | 26.8  | 73.2 | 1.5     | 50  | 63               | 63  | 79             | 79  | 330  | 47  |
| 60 | Tat (x1) 140-21  | 14.4 | 85.6 | 5.7   | 94.3 | 2.6     | 0   | 73               | 73  | 77             | 77  | 330  | 48  |
| 78 | Env 1423-21      | 8.3  | 91.7 | 11.5  | 88.5 | 2.6     | 0   | 72               | 72  | 76             | 76  | 328  | 49  |
| 70 | Vpu 144-21       | 5.9  | 94.1 | 14.0  | 86.0 | 2.3     | 0   | 65               | 65  | 83             | 83  | 328  | 50  |
| 47 | Pol 2880-20      | 29.2 | 70.8 | 16.0  | 84.0 | 1.8     | 20  | 74               | 74  | 79             | 79  | 328  | 51  |

| #  | Target               | %F.  |      | % p24 |      | Non sp. |     | % cons. ALL (p0) |     | % cons. B (p0) |     | C.s. | Rk. |
|----|----------------------|------|------|-------|------|---------|-----|------------------|-----|----------------|-----|------|-----|
|    |                      | Val. | Sc.  | Val.  | Sc.  | Val.    | Sc. | Val.             | Sc. | Val.           | Sc. |      |     |
| 51 | Vif 9-21             | 16.6 | 83.4 | 18.9  | 81.1 | 6.7     | 0   | 71               | 71  | 92             | 92  | 328  | 52  |
| 86 | Env 1432-21          | 7.3  | 92.7 | 32.0  | 68.0 | 1.8     | 20  | 65               | 65  | 81             | 81  | 327  | 53  |
| 19 | Pol 242-20           | 8.0  | 92.0 | 0.5   | 99.5 | 2.0     | 0   | 58               | 58  | 77             | 77  | 327  | 54  |
| 14 | Gag 534-20           | 40.1 | 59.9 | 14.7  | 85.3 | 1.7     | 30  | 69               | 69  | 80             | 80  | 324  | 55  |
| 30 | Pol 529-21           | 51.2 | 48.8 | 29.2  | 70.8 | 1.5     | 50  | 68               | 68  | 84             | 84  | 322  | 56  |
| 69 | Vpu 144-20           | 6.8  | 93.2 | 21.4  | 78.6 | 2.5     | 0   | 65               | 65  | 83             | 83  | 320  | 57  |
| 32 | Pol 925-20           | 14.5 | 85.5 | 2.7   | 97.3 | 3.6     | 0   | 60               | 60  | 77             | 77  | 320  | 58  |
| 12 | Gag 533-20           | 27.1 | 72.9 | 4.1   | 95.9 | 2.1     | 0   | 70               | 70  | 80             | 80  | 319  | 59  |
| 10 | Gag 532-20           | 55.4 | 44.6 | 46.0  | 54.1 | 1.3     | 70  | 70               | 70  | 80             | 80  | 319  | 60  |
| 9  | LTR 553-20           | 61.5 | 38.5 | 33.0  | 67.0 | 1.3     | 70  | 51               | 51  | 92             | 92  | 319  | 61  |
| 96 | <b>Nef 351-20</b>    | 38.5 | 61.5 | 36.3  | 63.7 | 1.2     | 80  | 49               | 49  | 62             | 62  | 316  | 62  |
| 61 | Tat (x1) 143-21      | 14.0 | 86.0 | 2.3   | 97.7 | 2.1     | 0   | 62               | 62  | 70             | 70  | 316  | 63  |
| 54 | Vif 12-20            | 12.8 | 87.2 | 30.8  | 69.2 | 5.1     | 0   | 70               | 70  | 89             | 89  | 315  | 64  |
| 89 | Env 1434-20          | 19.9 | 80.1 | 78.2  | 21.9 | 1.3     | 70  | 63               | 63  | 79             | 79  | 314  | 65  |
| 67 | Vpu 141-20           | 6.5  | 93.5 | 8.5   | 91.5 | 2.4     | 0   | 56               | 56  | 72             | 72  | 313  | 66  |
| 18 | Gag 698-20           | 20.9 | 79.1 | 12.2  | 87.9 | 5.0     | 0   | 70               | 70  | 76             | 76  | 313  | 67  |
| 15 | Gag 534-21           | 44.0 | 56.0 | 33.7  | 66.4 | 1.6     | 40  | 69               | 69  | 80             | 80  | 311  | 68  |
| 33 | Pol 926-20           | 20.3 | 79.7 | 8.5   | 91.5 | 2.2     | 0   | 60               | 60  | 77             | 77  | 308  | 69  |
| 73 | Vpu 147-21           | 6.2  | 93.8 | 5.8   | 94.2 | 2.7     | 0   | 53               | 53  | 63             | 63  | 304  | 70  |
| 1  | LTR 63-20            | 56.4 | 43.6 | 48.8  | 51.2 | 1.0     | 100 | 33               | 33  | 76             | 76  | 304  | 71  |
| 90 | Env 1436-20          | 42.3 | 57.7 | 88.1  | 12.0 | 1.1     | 90  | 64               | 64  | 80             | 80  | 304  | 72  |
| 63 | <b>Rev (x1) 9-20</b> | 15.0 | 85.0 | 11.6  | 88.4 | 2.9     | 0   | 60               | 60  | 68             | 68  | 301  | 73  |
| 74 | Vpu 148-21           | 6.0  | 94.0 | 8.2   | 91.8 | 2.7     | 0   | 53               | 53  | 62             | 62  | 301  | 74  |
| 66 | Vpu 140-21           | 24.6 | 75.4 | 67.4  | 32.6 | 1.5     | 50  | 64               | 64  | 78             | 78  | 300  | 75  |
| 16 | Gag 535-20           | 33.9 | 66.1 | 51.4  | 48.6 | 1.7     | 30  | 71               | 71  | 82             | 82  | 298  | 76  |
| 41 | Pol 2873-21          | 39.5 | 60.5 | 45.8  | 54.2 | 3.4     | 0   | 88               | 88  | 95             | 95  | 298  | 77  |
| 75 | Vpu 149-20           | 7.8  | 92.2 | 10.3  | 89.7 | 2.2     | 0   | 53               | 53  | 62             | 62  | 297  | 78  |
| 87 | Env 1433-20          | 18.2 | 81.8 | 89.9  | 10.1 | 1.5     | 50  | 65               | 65  | 81             | 81  | 288  | 79  |
| 31 | Pol 921-20           | 27.2 | 72.8 | 19.0  | 81.0 | 4.0     | 0   | 58               | 58  | 76             | 76  | 288  | 80  |
| 88 | Env 1433-21          | 18.9 | 81.1 | 72.6  | 0.0  | 1.4     | 60  | 65               | 65  | 81             | 81  | 287  | 81  |
| 3  | LTR 507-20           | 78.7 | 21.3 | 102   | -1.8 | 1.0     | 100 | 69               | 69  | 98             | 98  | 287  | 82  |
| 91 | Env 1437-20          | 63.0 | 37.0 | 99.9  | 0.0  | 1.0     | 100 | 66               | 66  | 83             | 83  | 286  | 83  |
| 34 | Pol 1161-20          | 19.6 | 80.4 | 6.5   | 93.5 | 2.3     | 0   | 32               | 32  | 75             | 75  | 281  | 84  |

| #  | Target          | %F.  |      | % p24 |      | Non sp. |     | % cons. ALL (p0) |     | % cons. B (p0) |     | C.s. | Rk. |
|----|-----------------|------|------|-------|------|---------|-----|------------------|-----|----------------|-----|------|-----|
|    |                 | Val. | Sc.  | Val.  | Sc.  | Val.    | Sc. | Val.             | Sc. | Val.           | Sc. |      |     |
| 76 | Env 628-20      | 47.7 | 52.3 | 68.3  | 31.8 | 1.5     | 50  | 61               | 61  | 85             | 85  | 280  | 85  |
| 95 | Nef 350-20      | 27.6 | 72.4 | 28.9  | 0.0  | 0.9     | 90  | 51               | 51  | 64             | 64  | 277  | 86  |
| 92 | Env 2308-20     | 18.8 | 81.2 | 35.6  | 64.4 | 2.2     | 0   | 43               | 43  | 74             | 74  | 263  | 87  |
| 2  | LTR 506-20      | 72.0 | 28.0 | 85.1  | 14.9 | 1.6     | 40  | 67               | 67  | 97             | 97  | 247  | 88  |
| 85 | Env 1432-20     | 12.0 | 88.0 | 40.5  | 0.0  | 2.0     | 0   | 65               | 65  | 81             | 81  | 234  | 89  |
| 28 | Pol 251-20      | 125  | -25  | 88.7  | 11.3 | 0.8     | 80  | 80               | 80  | 87             | 87  | 234  | 90  |
| 40 | Pol 2750-20     | 122  | -22  | 0.8   | 99.2 | 1.9     | 10  | 65               | 65  | 75             | 75  | 227  | 91  |
| 93 | Rev (x2) 158-20 | 8.0  | 0.0  | 2.5   | 97.5 | 2.1     | 0   | 48               | 48  | 76             | 76  | 222  | 92  |
| 84 | Env 1431-21     | 28.4 | 71.6 | 118   | -18  | 1.8     | 20  | 65               | 65  | 81             | 81  | 220  | 93  |
| 65 | Vpu 140-20      | 30.3 | 69.7 | 156   | -56  | 1.4     | 60  | 64               | 64  | 78             | 78  | 215  | 94  |
| 94 | Rev (x2) 159-20 | 11.4 | 0.0  | 10.1  | 89.9 | 3.4     | 0   | 48               | 48  | 75             | 75  | 213  | 95  |
| 50 | Pol 2885-20     | 103  | -2.6 | 212   | -112 | 0.8     | 80  | 64               | 64  | 79             | 79  | 108  | 96  |

## Additional methods

### Oligonucleotide templates for Phi-29 extension

The coding region for each hairpin was contained within a single oligonucleotide, organized in the following general format: 5'-GCGCGGATCC | core(20 - 21) | NCTCGAGN | core(20 - 21) | [G/A/C] | TTTTTTGGGAAGCTT-3'. Each oligonucleotide encoded a digestion 'seat' (for the RE to better bind the oligonucleotide), a 5' RE recognition site (*Bam* HI), the shRNA sense stem region, loop sequence, anti-sense stem, a termination spacer (if required), a pol III termination signal consisting of a run of at least 4 'T's, a 3' RE recognition site (*Hind* III) and a 3' digestion seat. The termination spacer was included only if the last base of the anti-sense stem was 'T', so as to prevent premature termination via an early run of 'T's. A short primer was designed to bind at the 3' end of the template oligo and introduced the 3' seat (5'-CGCGAAGCTTCCAAAAA-3').

Oligos were ordered at the minimal synthesis and purification scales (0.05  $\mu$ M and desalt, Sigma-Genosys) and were re-suspended in water (1 - 10  $\mu$ g /  $\mu$ l). Twenty picomoles of each oligo was used in the extension reaction (1x reaction buffer, 2x BSA, 20  $\mu$ M dNTPs (1  $\mu$ l of a 10 mM stock), 10 units of Phi29 (New England Biolabs) and water to 20  $\mu$ l), which was incubated at 30 °C for ~10 min., then 65 °C for 10 min. (to disable the polymerase). The extension product was digested (*Bam* HI plus *Hind* III), purified using the Nucleotide Removal kit (Qiagen), ligated to the expression plasmid and used to transform electrocompetent GT116 *E.coli*. Positive clones were confirmed by automated sequencing using our loop digestion method (see below). The following table lists the **93** oligonucleotide template sequences ordered as Phi-29 extension templates.

| Hairpin # | Target (NL4-3) | Oligonucleotide template (5' to 3')                                              |
|-----------|----------------|----------------------------------------------------------------------------------|
| 1         | LTR 63-20      | GCGCGGATCCCAAGGCTACTTCCCTGATTGCCTCGAGCCAATCAGG<br>GAAGTAGCCTTGTTTTTTGGGAAGCTT    |
| 2         | LTR 506-20     | GCGCGGATCCGGAACCCACTGCTTAAGCCTGCTCGAGGAGGCTTAA<br>GCAGTGGGTTCTTTTTTGGGAAGCTT     |
| 3         | LTR 507-20     | GCGCGGATCCGAACCCACTGCTTAAGCCTCTCTCGAGTGAGGCTTAA<br>GCAGTGGGTTCTTTTTTGGGAAGCTT    |
| 4         | LTR 509-20     | GCGCGGATCCACCCACTGCTTAAGCCTCAAACCTCGAGATTGAGGCTT<br>AAGCAGTGGGTTTTTTTTGGGAAGCTT  |
| 5         | LTR 510-21     | GCGCGGATCCCCACTGCTTAAGCCTCAATAACTCGAGATATTGAGG<br>CTTAAGCAGTGGGTTTTTTTTGGGAAGCTT |
| 6         | LTR 516-21     | Overlapping oligonucleotide pair used instead, see below                         |
| 7         | LTR 522-20     | Overlapping oligonucleotide pair used instead, see below                         |

| Hairpin # | Target (NL4-3) | Oligonucleotide template (5' to 3')                                            |
|-----------|----------------|--------------------------------------------------------------------------------|
| 8         | LTR 527-21     | Overlapping oligonucleotide pair used instead, see below                       |
| 9         | LTR 553-20     | GCGCGGATCCGTAGTGTGCCCCGTCTGTTCCCTCGAGCAACAGACG<br>GGCACACACTACTTTTTTGAAGCTT    |
| 10        | Gag 532-20     | GCGCGGATCCGGAGCCACCCCAAGATTTCTCGAGTAAATCTTGT<br>GGGGTGGCTCCTTTTTTGAAGCTT       |
| 11        | Gag 532-21     | GCGCGGATCCGGAGCCACCCCAAGATTTAACTCGAGATAAATCTT<br>GTGGGGTGGCTCCTTTTTTGAAGCTT    |
| 12        | Gag 533-20     | GCGCGGATCCGAGCCACCCCAAGATTTATCTCGAGTAAATCTTGT<br>GGGGTGGCTCCTTTTTTGAAGCTT      |
| 13        | Gag 533-21     | GCGCGGATCCGAGCCACCCCAAGATTTAACTCGAGATAAATCTT<br>GTGGGGTGGCTCCTTTTTTGAAGCTT     |
| 14        | Gag 534-20     | GCGCGGATCCAGCCACCCCAAGATTTAATCTCGAGTTAAATCTTG<br>TGGGGTGGCTCCTTTTTTGAAGCTT     |
| 15        | Gag 534-21     | GCGCGGATCCAGCCACCCCAAGATTTAAACTCGAGATTTAAATCT<br>TGTGGGGTGGCTCCTTTTTTGAAGCTT   |
| 16        | Gag 535-20     | GCGCGGATCCGCCACCCCAAGATTTAAACTCGAGATTTAAATCTT<br>GTGGGGTGGCTCCTTTTTTGAAGCTT    |
| 17        | Gag 578-20     | GCGCGGATCCGACATCAAGCAGCCATGCAATCTCGAGTTTGCATGGC<br>TGCTTGATGTCTTTTTTGAAGCTT    |
| 18        | Gag 698-20     | GCGCGGATCCGAAGTGACATAGCAGGAATTCTCGAGTAGTTCCTGC<br>TATGTCACCTCTTTTTTGAAGCTT     |
| 19        | Pol 242-20     | GCGCGGATCCATACAGGAGCAGATGATACACCTCGAGCTGTATCATCT<br>GCTCCTGTATCTTTTTTGAAGCTT   |
| 20        | Pol 246-21     | GCGCGGATCCAGGAGCAGATGATACAGTATTACTCGAGAAATACTGTA<br>TCATCTGCTCCTTTTTTGAAGCTT   |
| 21        | Pol 247-21     | GCGCGGATCCGGAGCAGATGATACAGTATTAACTCGAGATAATACTGTA<br>TCATCTGCTCCTTTTTTGAAGCTT  |
| 22        | Pol 248-20     | GCGCGGATCCGAGCAGATGATACAGTATTACCTCGAGCTAATACTGTAT<br>CATCTGCTCTTTTTTGAAGCTT    |
| 23        | Pol 248-21     | GCGCGGATCCGAGCAGATGATACAGTATTAGACTCGAGACTAATACTG<br>TATCATCTGCTCTTTTTTGAAGCTT  |
| 24        | Pol 249-20     | GCGCGGATCCAGCAGATGATACAGTATTAGTCTCGAGTCTAATACTGTA<br>TCATCTGCTCTTTTTTGAAGCTT   |
| 25        | Pol 249-21     | GCGCGGATCCAGCAGATGATACAGTATTAGAACTCGAGATCTAATACT<br>GTATCATCTGCTCTTTTTTGAAGCTT |
| 26        | Pol 250-20     | GCGCGGATCCGCAGATGATACAGTATTAGATCTCGAGTTCTAATACTGT<br>ATCATCTGCTCTTTTTTGAAGCTT  |
| 27        | Pol 250-21     | GCGCGGATCCGCAGATGATACAGTATTAGAACTCGAGATTCTAATACT<br>GTATCATCTGCTCTTTTTTGAAGCTT |
| 28        | Pol 251-20     | GCGCGGATCCCAGATGATACAGTATTAGAACCTCGAGCTTCTAATACT<br>GTATCATCTGTTTTTGAAGCTT     |



| Hairpin # | Target (NL4-3) | Oligonucleotide template (5' to 3')                                             |
|-----------|----------------|---------------------------------------------------------------------------------|
| 29        | Pol 404-20     | GCGCGGATCCCTACACCTGTCAACATAATTCCTCGAGCAATTATGTTG<br>ACAGGTGTAGTTTTTTGGAAGCTT    |
| 30        | Pol 529-21     | GCGCGGATCCAACAATGGCCATTGACAGAAACTCGAGATTCTGTCA<br>ATGGCCATTGTTATTTTTGGAAGCTT    |
| 31        | Pol 921-20     | GCGCGGATCCATGGAAGGATCACCAGCAAACCTCGAGATTGCTGGTG<br>ATCCTTTCCATCTTTTTTGAAGCTT    |
| 32        | Pol 925-20     | GCGCGGATCCAAGGATCACCAGCAATATTGCTCGAGGAATATTGCTG<br>GTGATCCTTTCTTTTTGGAAGCTT     |
| 33        | Pol 926-20     | GCGCGGATCCAAGGATCACCAGCAATATTGCTCGAGGAATATTGCT<br>GGTGATCCTTTTTTTGGAAGCTT       |
| 34        | Pol 1161-20    | GCGCGGATCCTGAACTCCATCCTGATAAATCCTCGAGCATTATCAGG<br>ATGGAGTTCATTTTTGGAAGCTT      |
| 35        | Pol 2668-21    | GCGCGGATCCGAGTACAAATGGCAGTATTCACTCGAGAGAATACTG<br>CCATTTGACTGCTTTTTTGAAGCTT     |
| 36        | Pol 2670-21    | GCGCGGATCCAGTACAAATGGCAGTATTCATACTCGAGAATGAATACT<br>GCCATTTGACTGTTTTTGAAGCTT    |
| 37        | Pol 2671-21    | GCGCGGATCCGTACAAATGGCAGTATTCATACTCGAGAGATGAATAC<br>TGCCATTTGACTTTTTTGAAGCTT     |
| 38        | Pol 2724-20    | GCGCGGATCCGTACAGTGCAGGGGAAAGAAACTCGAGATTCTTTCCC<br>CTGCACTGTACTTTTTTGAAGCTT     |
| 39        | Pol 2726-21    | GCGCGGATCCACAGTGCAGGGGAAAGAATAGACTCGAGACTATTCTT<br>TCCCCTGCACTGTATTTTTGGAAGCTT  |
| 40        | Pol 2750-20    | GCGCGGATCCACATAATAGCAACAGACATAGCTCGAGGTATGTCTGTT<br>GCTATTATGTCTTTTTTGAAGCTT    |
| 41        | Pol 2873-21    | GCGCGGATCCGAAAGGTGAAGGGGCAGTAGACTCGAGACTACTGC<br>CCCTTCACCTTTCCTTTTTTGAAGCTT    |
| 42        | Pol 2874-21    | GCGCGGATCCGAAAGGTGAAGGGGCAGTAGTACTCGAGAACTACTG<br>CCCCTTCACCTTCTTTTTTGAAGCTT    |
| 43        | Pol 2878-20    | GCGCGGATCCGGTGAAGGGGCAGTAGTAATTCTCGAGTATTACTACTG<br>CCCCTTCACCTTTTTTGAAGCTT     |
| 44        | Pol 2878-21    | GCGCGGATCCGGTGAAGGGGCAGTAGTAATAACTCGAGATATTACTAC<br>TGCCCCTTCACCTTTTTTGAAGCTT   |
| 45        | Pol 2879-20    | GCGCGGATCCGTGAAGGGGCAGTAGTAATAGCTCGAGGTATTACTACT<br>GCCCTTCACTTTTTTGGAAGCTT     |
| 46        | Pol 2879-21    | GCGCGGATCCGTGAAGGGGCAGTAGTAATACTCGAGAGTATTACTA<br>CTGCCCTTCACTTTTTTGGAAGCTT     |
| 47        | Pol 2880-20    | GCGCGGATCCTGAAGGGGCAGTAGTAATACTCTCGAGTGTATTACTAC<br>TGCCCCTTCATTTTTTGAAGCTT     |
| 48        | Pol 2881-21    | GCGCGGATCCGAAGGGGCAGTAGTAATACAAACTCGAGATTGTATTAC<br>TACTGCCCTTCTTTTTTGAAGCTT    |
| 49        | Pol 2882-21    | GCGCGGATCCAAGGGGCAGTAGTAATACAAGACTCGAGACTTGATTATTA<br>CTACTGCCCTTCTTTTTTGAAGCTT |

| Hairpin # | Target (NL4-3)      | Oligonucleotide template (5' to 3')                                            |
|-----------|---------------------|--------------------------------------------------------------------------------|
| 50        | Pol 2885-20         | GCGCGGATCCGGGCAGTAGTAATACAAGATTCTCGAGTATCTTGATTA<br>CTACTGCCCTTTTTTGAAGCTT     |
| 51        | Vif 9-21            | GCGCGGATCCCAGATGGCAGGTGATGATTGTACTIONGAGAACAATCAT<br>CACCTGCCATCTGTTTTTGAAGCTT |
| 52        | Vif 10-21           | GCGCGGATCCAGATGGCAGGTGATGATTGTGACTCGAGACACAATCA<br>TCACCTGCCATCTGTTTTTGAAGCTT  |
| 53        | Vif 11-21           | GCGCGGATCCGATGGCAGGTGATGATTGTGACTCGAGAACACAATC<br>ATCACCTGCCATCTTTTTTGAAGCTT   |
| 54        | Vif 12-20           | GCGCGGATCCATGGCAGGTGATGATTGTGCTCGAGCACACAATCA<br>TCACCTGCCATCTTTTTTGAAGCTT     |
| 55        | Vif 14-21           | GCGCGGATCCGGCAGGTGATGATTGTGGCACTCGAGAGCCACAC<br>AATCATCACCTGCCCTTTTTTGAAGCTT   |
| 56        | Vif 15-21           | GCGCGGATCCGAGGTGATGATTGTGGCAACTCGAGATGCCACA<br>CAATCATCACCTGCTTTTTTGAAGCTT     |
| 57        | Vif 37-20           | GCGCGGATCCGTAGACAGGATGAGGATTAAGCTCGAGGTTAATCCTC<br>ATCCTGTCTACTTTTTTGAAGCTT    |
| 58        | Tat (exon 1) 131-20 | GCGCGGATCCGCATCTCCTATGGCAGGAAGTCTCGAGTCTTCCTGCC<br>ATAGGAGATGCTTTTTTGAAGCTT    |
| 59        | Tat (exon 1) 132-21 | GCGCGGATCCCATCTCCTATGGCAGGAAGAACTCGAGATTCTTCCT<br>GCCATAGGAGATGTTTTTGAAGCTT    |
| 60        | Tat (exon 1) 140-21 | GCGCGGATCCATGGCAGGAAGAAGCGGAGACACTCGAGAGTCTCC<br>GCTTCTCCTGCCATATTTTTTGAAGCTT  |
| 61        | Tat (exon 1) 143-21 | GCGCGGATCCGAGGAAGAAGCGGAGACAGCACTCGAGAGCTGTC<br>TCCGCTTCTCCTGCTTTTTTGAAGCTT    |
| 62        | Tat (exon 1) 147-20 | GCGCGGATCCGAAGAAGCGGAGACAGCGACCCTCGAGCGTCGCTG<br>TCTCCGCTTCTTTTTTGAAGCTT       |
| 63        | Rev (exon 1) 9-20   | GCGCGGATCCAAGAAGCGGAGACAGCGACTCTCGAGTCGTCGCT<br>GTCTCCGCTTCTTTTTTGAAGCTT       |
| 64        | Vpu 139-21          | GCGCGGATCCGAAAGAGCAGAAGACAGTGGCACTCGAGAGCCACT<br>GTCTTCTGCTCTTCTTTTTTGAAGCTT   |
| 65        | Vpu 140-20          | GCGCGGATCCAAGAGCAGAAGACAGTGGCTCTCGAGTGCCACTGT<br>CTTCTGCTCTTCTTTTTTGAAGCTT     |
| 66        | Vpu 140-21          | GCGCGGATCCAAGAGCAGAAGACAGTGGCAACTCGAGATGCCACT<br>GTCTTCTGCTCTTCTTTTTTGAAGCTT   |
| 67        | Vpu 141-20          | GCGCGGATCCAAGAGCAGAAGACAGTGGCATCTCGAGTTGCCACTG<br>TCTTCTGCTCTTTTTTGAAGCTT      |
| 68        | Vpu 143-20          | GCGCGGATCCGAGCAGAAGACAGTGGCAATCCTCGAGCATTGCCAC<br>TGTCTTCTGCTCTTTTTTGAAGCTT    |
| 69        | Vpu 144-20          | GCGCGGATCCAGCAGAAGACAGTGGCAATGTCTCGAGTCATTGCCA<br>CTGTCTTCTGCTCTTTTTTGAAGCTT   |
| 70        | Vpu 144-21          | GCGCGGATCCAGCAGAAGACAGTGGCAATGAACTCGAGATCATTGC<br>CACTGTCTTCTGCTCTTTTTTGAAGCTT |

| Hairpin # | Target (NL4-3) | Oligonucleotide template (5' to 3')                                            |
|-----------|----------------|--------------------------------------------------------------------------------|
| 71        | Vpu 145-20     | GCGCGGATCCGCAGAAGACAGTGGCAATGACCTCGAGCTCATTGCC<br>ACTGTCTTCTGCTTTTTTGAAGCTT    |
| 72        | Vpu 146-20     | GCGCGGATCCCAGAAGACAGTGGCAATGAGTCTCGAGTCTCATTGC<br>CACTGTCTTCTGTTTTTGAAGCTT     |
| 73        | Vpu 147-21     | GCGCGGATCCAGAAGACAGTGGCAATGAGAGACTCGAGACTCTCATT<br>GCCACTGTCTTCTGTTTTTGAAGCTT  |
| 74        | Vpu 148-21     | GCGCGGATCCGAAGACAGTGGCAATGAGAGTACTCGAGAACTCTCAT<br>TGCCACTGTCTTCTTTTTTGAAGCTT  |
| 75        | Vpu 149-20     | GCGCGGATCCAAGACAGTGGCAATGAGAGTCTCGAGCACTCTCATT<br>GCCACTGTCTTCTTTTTTGAAGCTT    |
| 76        | Env 628-20     | GCGCGGATCCCCAATTCCCATACATTATTGACTCGAGACAATAATGTAT<br>GGGAATTGGTTTTTGAAGCTT     |
| 77        | Env 1423-20    | GCGCGGATCCGACAATTGGAGAAGTGAATTTCTCGAGTAATTCAC TTC<br>TCCAATTGTCTTTTTTGAAGCTT   |
| 78        | Env 1423-21    | GCGCGGATCCGACAATTGGAGAAGTGAATTA ACTCGAGATAATTCACT<br>TCTCCAATTGTCTTTTTTGAAGCTT |
| 79        | Env 1424-21    | GCGCGGATCCACAATTGGAGAAGTGAATTATACTCGAGAATAATTCACT<br>TCTCCAATTGTCTTTTTTGAAGCTT |
| 80        | Env 1425-20    | GCGCGGATCCCCAATTGGAGAAGTGAATTATTCTCGAGTATAATTCACT<br>CTCCAATTGTTTTTGAAGCTT     |
| 81        | Env 1425-21    | GCGCGGATCCCCAATTGGAGAAGTGAATTATAACTCGAGATATAATTCAC<br>TTCTCCAATTGTTTTTGAAGCTT  |
| 82        | Env 1426-21    | GCGCGGATCCAATTGGAGAAGTGAATTATACTCGAGAATAATAATTCAC<br>CTTCTCCAATTGTTTTTGAAGCTT  |
| 83        | Env 1428-21    | GCGCGGATCCTTGGAGAAGTGAATTATATAAACTCGAGATTATATAATTC<br>ACTTCTCCAATTTTTTGAAGCTT  |
| 84        | Env 1431-21    | GCGCGGATCCGAGAAGTGAATTATATAAAATAACTCGAGATATTTATATAAT<br>TCACTTCTTTTTTGAAGCTT   |
| 85        | Env 1432-20    | GCGCGGATCCAGAAGTGAATTATATAAAATAACTCGAGATATTTATATAATT<br>CACTTCTTTTTTGAAGCTT    |
| 86        | Env 1432-21    | GCGCGGATCCAGAAGTGAATTATATAAATAACTCGAGAATAATTTATATAA<br>TTCACTTCTTTTTTGAAGCTT   |
| 87        | Env 1433-20    | GCGCGGATCCGAAGTGAATTATATAAATATTCTCGAGTATATTTATATAAAT<br>CACTTCTTTTTTGAAGCTT    |
| 88        | Env 1433-21    | GCGCGGATCCGAAGTGAATTATATAAATAACTCGAGATATATTTATATA<br>ATTCACTTCTTTTTTGAAGCTT    |
| 89        | Env 1434-20    | GCGCGGATCCAAGTGAATTATATAAATATATCTCGAGTTATATTTATATAAT<br>TCACTTCTTTTTTGAAGCTT   |
| 90        | Env 1436-20    | GCGCGGATCCGTGAATTATATAAATAAACCTCGAGCTTTATATTTATAT<br>AATTCACTTTTTTGAAGCTT      |
| 91        | Env 1437-20    | GCGCGGATCCTGAATTATATAAATAAAGACTCGAGACTTTATATTTATA<br>TAATTCATTTTTTGAAGCTT      |

| Hairpin # | Target (NL4-3)      | Oligonucleotide template (5' to 3')                                            |
|-----------|---------------------|--------------------------------------------------------------------------------|
| 92        | Env 2308-20         | GCGCGGATCCAGAGACTTACTCTTGATTGTTCTCGAGTACAATCAAGA<br>GTAAGTCTCTCTTTTTTGGGAAGCTT |
| 93        | Rev (exon 2) 158-20 | GCGCGGATCCTGAGAGACTTACTCTTGATTCTCGAGCAATCAAGAG<br>TAAGTCTCTCATTTTTTGGGAAGCTT   |
| 94        | Rev (exon 2) 159-20 | GCGCGGATCCGAGAGACTTACTCTTGATTGACTCGAGACAATCAAGA<br>GTAAGTCTCTCTTTTTTGGGAAGCTT  |
| 95        | Nef 350-20          | GCGCGGATCCCACAAGGCTACTTCCCTGATACTCGAGAATCAGGGAA<br>GTAGCCTTGTGTTTTTGGGAAGCTT   |
| 96        | Nef 351-20          | GCGCGGATCCACAAGGCTACTTCCCTGATTCTCGAGCAATCAGGGA<br>AGTAGCCTTGTGTTTTTGGGAAGCTT   |

*n.b.* The target positions are the co-ordinates within each gene of NL4-3.

### Oligonucleotide pairs for making synthetic inserts with offset ends

Three hairpin templates were created from standard complementary oligonucleotide pairs with offset ends as each hairpin core sequence contained an internal *Hind* III site making it incompatible with the Phi-29 extension method. These templates were made as synthetic duplexes with overhanging ends identical to those created by restriction enzyme (RE) digestion (*Bam* HI at the 5' and *Hind* III at the 3'). The coding region for each hairpin was contained within a single oligonucleotide (upper oligo: 5'-GATCC | core(20 - 21) | NCTCGAGN | core(20 - 21) | [G/A/C] | TTTTTTGGGA-3') and its complementary equivalent (lower oligo: 5'-AGCTTCCAAAAA | [G/A/C] | core(20 - 21) | NCTCGAGN | core(20 - 21) | G-3'). Both oligos were synthesized and re-suspended as previously described. 1  $\mu$ l from each was added to 98  $\mu$ l of annealing solution (10 mM Tris pH 8.0, 50 mM NaCl, 1 mM EDTA), heated to 100 °C for 5 minutes, slowly equilibrated to room temperature and diluted up to 10,000 fold for ligation. The inserts and plasmids were ligated, and used to transform electrocompetent GT116 *E.coli* (Invivogen). The following table lists the 3 hairpin templates ordered as complementary oligonucleotide pairs.

| Hairpin # | Target     | Oligonucleotide template (5' to 3')                                   |
|-----------|------------|-----------------------------------------------------------------------|
| 6 (lower) | LTR 516-21 | AGCTTTCCAAAAAGCTTAAGCCTCAATAAAGCTTTCTCGAGTAAGCTT<br>TATTGAGGCTTAAGCG  |
| 6 (upper) | "          | GATCCGCTTAAGCCTCAATAAAGCTTACTCGAGAAAGCTTTATTGAGG<br>CTTAAGCTTTTTTGGGA |
| 7 (lower) | LTR 522-20 | AGCTTTCCAAAAAGCCTCAATAAAGCTTGCCTTGCTCGAGGAAGGC<br>AAGCTTTATTGAGGCG    |
| 7 (upper) | "          | GATCCGCCTCAATAAAGCTTGCCTTCTCGAGCAAGGCAAGCTTTATT<br>GAGGCTTTTTTGGGA    |
| 8 (lower) | LTR 527-21 | AGCTTTCCAAAAACAATAAAGCTTGCCTTGAGTGCTCTCGAGTGAC<br>TCAAGGCAAGCTTTATTG  |

| Hairpin # | Target | Oligonucleotide template (5' to 3')                                   |
|-----------|--------|-----------------------------------------------------------------------|
| 8 (upper) | “      | GATCCAATAAAGCTTGCCTTGAGTGCACTCGAGAGCACTCAAGGCAA<br>GCTTTATTGTTTTTTGGA |

### Oligonucleotide templates for the off-target control shRNA

The off-target hairpin plasmid was taken from previous work, but was originally constructed using standard complementary oligonucleotide pairs as described above. The following table lists the corresponding complementary oligonucleotide pairs, with the stem region indicated in light grey.

| Hairpin #          | Target | Oligonucleotide template (5' to 3')                                                   |
|--------------------|--------|---------------------------------------------------------------------------------------|
| off target (upper) | none   | GATCCAAGACAGTCCAACACACGCCACCTGTCTCTCTCGAGTGAGA<br>CAGGTGGCGTGTGTTGGACTGTCTTTTTTTTGGGA |
| off target (lower) | “      | AGCTTTCCAAAAAAGACAGTCCAACACACGCCACCTGTCTCACTC<br>GAGAGAGACAGGTGGCGTGTGTTGGACTGTCTTG   |

### shRNA plasmid sequence confirmation by loop digestion

Each construct was digested and sequenced in two reactions, one containing the forward primer, the other containing the reverse. The primers bound to the expression plasmid backbone approximately 100 bases away from the region encoding the base of the hairpin stem. Each reaction contained: 1x RE buffer (NEB-2, New England Biolabs), 1x BSA, ~ 500 ng of template plasmid, 10 pmol of sequencing primer, ~ 10 units XhoI and water to a total volume of 16  $\mu$ l, and was incubated at 37 °C for 30 - 60 min. prior to shipping, without purification, to an automated sequencing facility (Australian Genome Research Facility, AGRF).

## The gene sequences

The HIV-1 hairpins used in this project were designed to target the common laboratory strain, NL4-3 [Genbank:**AF324493**]. The gene sequences from this strain were as follows:

### LTR

tggaagggctaattcactcccaagaagacaagatatccttgatctgtggatctaccacacacaaggctactccctgattgg  
cagaactacacaccagggccaggggtcagatatccactgaccttggatggtgctacaagctagtaccagttgagccagat  
aaggtagaagaggccaataaaggagagaacaccagctgttacacctgtgagcctgcatggaatggatgacctgagag  
agaagtgttagagtggaggttgacagccgctagctttcatcacgtggcccgagagctgcatccggagtactcaagaac  
tgctgacatcgagctgtacaagggactttccgctggggactttccagggaggcgtggcctgggaggactggggagtgg  
cgagccctcagatgctgcatataagcagctgctttgctgtactgggtctctctggttagaccagatctgagcctgggagctc  
tctggctaactaggaacccactgctaagcctcaataaagcttgcttgagtgttcaagtagtgtgtgccgctgtgtgtga  
ctctggtaactagagatccctcagacccttttagtcagtggtgaaaatctctagca

### Gag

atgggtgagagcgtcggattaagcgggggagaattagataaatgggaaaaattcggtaaggccagggggaaagaa  
acaatataaactaaaacatatagatgggcaagcaggagctagaacgattcgagtaatcctggccttttagagacatcag  
aaggctgtagacaataactgggacagctacaaccatccctcagacaggatcagaagaacttagatcattatataatacaata  
gcagctctctattgtgtgcatcaaaggatagatgtaaagacaccaaggaagccttagataagatagaggaagagcaaac  
aaaagtaagaaaaaggcacagcaagcagcagctgacacaggaaacaacagccaggtcagccaaaattaccctatagtg  
cagaacctccaggggcaaatggtacatcaggccatcacctagaactttaaagcagtggttaaagtagtagaagagaag  
gctttcagcccagaagtaataacctgtttcagcattatcagaaggagccaccccacaagatttaaataccatgctaaacac  
agtggggggacatcaagcagccatgcaaatgttaaagagaccatcaatgaggaagctgcagaatgggtagattgcatc  
cagtgcatgcagggcctattgcaccaggccagatgagagaaccaaggggaagtacatagcaggaactactagaccctt  
caggaacaaataggatggatgacacataatccacctatcccagtaggagaaatctataaaagatggataatcctgggattaa  
ataaaatagtaagaatgtatagccctaccagcattctggacataagacaaggaccaaaggaaccccttagagactatgtaga  
ccgattctataaaactctaagagccgagcaagcttacaagaggtaaaaaattggatgacagaaacctgttggtccaaaat  
gcaacccagattgtaagactatftaaagcattgggaccaggagcgcactagaagaaatgatgacagcatgtcagggga  
gtggggggaccggccataaagcaagagtttggctgaagcaatgagccaagtaacaaatccagctaccataatgataca  
gaaaggcaatfttaggaaccaaagaaagactgttaagtttcaattgtggcaagaaggccacatagccaaaattgcagg  
gcccctaggaaaaaggctgttggaatgtgaaaggaaggacaccaaataagattgtactgagagacaggcctaattttt  
tagggaagatctggcctcccacaaggaagccagggaaattttctcagagcagaccagagccaacagccccaccaga  
agagagcttcaggttggggaagagacaacaactccctctcagaagcaggagccgatagacaaggaactgtatcctttagc  
ttccctcagatcactctttggcagcagcccctcgtcacaataa

### Pol

tttttagggaagatctggcctcccacaaggaaggccagggaaattttctcagagcagaccagagccaacagccccacc  
agaagagagcttcaggttggggaagagacaacaactccctctcagaagcaggagccgatagacaaggaactgtatccttt

agctccctcagatcactcttggcagcgacccctcgtcacaataagataggggggcaattaaaggaagctctattagatac  
 aggagcagatgatacagattagaagaatgaattgccaggaagatgaaacccaaaatgatagggggaattggaggtttt  
 atcaaagtaagacagatgatcagatactcatagaaatctgcgacataaagctataggtacagattagtaggacctacacc  
 tgtcaacataaattggaagaaatctgtgactcagattggctgcactttaaatttccattagctctattgagactgtaccagtaaa  
 attaaagccaggaatggatggccaaaagttaacaatggccattgacagaagaaaaataaaagcattagtagaaatttgt  
 acagaaatgaaaaggaaggaaaaaattcaaaaattggcctgaaaatccatacaactccagatttgcataaagaaaa  
 aagacagactaataatggagaaaattagtagattcagagaacttaataagagaactcaagatttctgggaagtcaattaggaa  
 taccacatcctgcagggttaaacagaaaaatcagtaacagactggatgtggcgatgcatatttccagttcccttagataa  
 agactcaggaagtatactgcattaccatactagataaacaatgagacaccagggttagatcagtagcaatgtgctcc  
 acagggatgaaaggatcaccagcaatattccagtgtagcatgacaaaaatcttagagccttttagaaaacaaaatccagac  
 atagtcacatcaatcatgatgattgtatgtaggatctgacttagaaatagggcagcatagaacaaaaatagaggaactg  
 agacaacatctgtgaggtggggttaccacaccagacaaaaacatcagaagaacctccattccttggatgggttatga  
 actccatcctgataaatggacagtcacgcctatagtgtgccagaaaaggacagctggactgtcaatgacatacagaaatta  
 gtgggaaaattgaattgggcaagttagattatgcagggttaagtaaggcaattatgtaaacttcttaggggaaccaaagc  
 actaacagaagtagtaccactaacagaagaagcagagctagaactggcagaaaacaggagattctaaagaaccggtg  
 catggagtgtattatgacctcaaaagacttaatagcagaatacagaagcaggggcaaggccaatggacatatcaaattt  
 atcaagagccatttaaaaatctgaaaacaggaaaatagcaagaatgaagggtgccacactaatgatgtaaacaaat  
 agaggcagtagcaaaaaatagccacagaaagcatagtaatatgggaaagactcctaaattaaattaccatacaaaagga  
 aacatgggaagcatggtggacagagattggcaagccactggattcctgagtgagggttgtcaatccccctcccttagtga  
 agttatggtaccagttagagaagaaccataataggagcagaaacttctatgtagatggggcagccaatagggaaactaa  
 attagaaaagcaggatagtaactgacagaggaagacaaaaagttgtcccctaacggacacacaaaatcagaagactg  
 agttacaagcaattcatctagcttgcaggattcgggattagaagtaaacatagtgacagactcacaatatgattgggaatcat  
 tcaagcacaaccagataagagtgatcagagttagtcagtcacaataatagagcagttataaaaaaggaaaaagctacctg  
 gcatgggtaccagcacacaaaaggaattggaggaaatgaacaagtagatgggttggtcagtgctggaatcaggaaagtacta  
 ttttagatggaatagataaggcccaagaagaacatgagaaatcacagtaattggagagcaatggctagtgatttaacct  
 ccacctgtagtagcaaaagaaatagtagccagctgtgataaatgtcagctaaaagggaagccatgcatggacaagtaga  
 ctgtagcccaggaatattggcagctagattgtacacatttagaaggaaaagttatcttggtagcagttcatgtagccagtgat  
 atagaagcagaagtaattccagcagagacagggcaagaacagcactcctccttaaaattagcaggaagatggccagta  
 aaaacagtagacacagacaatggcagcaattcaccagtagcagttaggccgctgttggtgggggggatcaagcag  
 gaattggcattccctacaatccccaaagcaaggagtaatagaatctatgaataaagaattaaagaaaattataggacaggt  
 aagagatcaggctgaacatcttaagacagcagtagcaaatggcagtagtccacaattttaaagaaaaaggggggattggg  
 ggttagcagtgaggggaaagaatagtagacataatagcaacagacatacaaaactaaagaattacaaaaacaaattacaaa  
 aattcaaaaatttctgggtttattacagggacagcagagatccagttggaaggaccagaaaagctcctctggaagggtgaag  
 gggcagtagtaatacaagataatagtagcataaaagtagtccaagaagaaaagcaagatcatcagggtatttgaaaaac  
 agatggcaggtgatgattgtgtggcaagtagacaggttaggattaa

## Vif

Atggaaaacagatggcaggtgatgattgtgtggcaagtagacaggttaggattaacacatggaaaagattagtaaacac  
 catatgtatattcaaggaaagctaaggactggtttatagacatcactatgaaagtactaatcaaaaaataagttcagaagtac  
 acatcccactaggggatgctaaattagtaataacaacatattggggtctgcatacaggagaaagagactggcatttgggtcag

ggagtctccatagaatggagggaaaaagagatatagcacacaagtagaccctgacctagcagaccaactaattcatctgcac  
 tattttgattgttttcagaatctgctataagaaataccatattaggacgtatagttagctctaggtggaatatcaagcaggacata  
 acaaggttaggatctctacagacttggcactagcagcattaataaaacaaaacagataaagccacctttgacctagtgtagg  
 aaactgacagaggacagatggaacaagccccagaagaccaagggccacagagggagccatacaatgaatggacacta  
 g

**Vpr**

atggaacaagccccagaagaccaagggccacagagggagccatacaatgaatggacactagagcttttagaggaactta  
 agagtgaagctgttagacatttcctaggatattggctccataacttaggacaacatatctatgaaacttacggggatacttgggc  
 aggagtggaagccataataagaattctgcaacaactgctgtttatccatttcagaattgggtgtcgacatagcagaataggcgt  
 tactcgacagagggagagcaagaaatggagccagtagatcctag

**Tat (x1)**

atggagccagtagatcctagactagagccctggaagcatccaggaagtcagcctaaaactgcttgaccaattgctattgtaa  
 aaagtgtgctttcattgccaagtttgttcatgacaaaagccttaggcatctcctatggcaggaagaagcgggagacagcgac  
 gaagagctcatcagaacagtcagactcatcaagcttctctatcaaagca

**Rev (x1)**

atggcaggaagaagcgggagacagcgacgaagagctcatcagaacagtcagactcatcaagcttctctatcaaagca

**Vpu**

atgcaacctataatagtagcaatagtagcattagtagtagcaataataatagcaatagttgtgtggtccatagtaatcatagaata  
 taggaaaatattaagacaaaagaaaatagacaggtaattgatagactaatagaaagagcagaagacagtggaatgagag  
 tgaaggagaagatcagcacttgtggagatgggggtggaaatggggcaccatgctccttgggatattgatgatctgtag

**Env**

atgagagtgaaggagaagatcagcacttgtggagatgggggtggaaatggggcaccatgctccttgggatattgatgatct  
 gtagtgctacagaaaaattgtgggtcacagtctattatggggtacctgtgtggaaggaagcaaccaccactctattttgctatc  
 agatgctaaagcatatgatacagaggtacataatgtttgggccacacatgctgtgtaccacagaccccaaccacaaga  
 agtagtattgtaaatgtgacagaaaatttaacatgtgaaaaatgacatggtagaacagatgcatgaggatataatcagttta  
 tgggatcaaagcctaaagccatgtgtaaaattaaccccactctgtgttagttaaagtgcactgattgaagaatgataactaatac  
 caatagtagtagcgggagaatgataatggagaaaggagagataaaaaactgctcttcaatatcagcacaagcataagaga  
 taaggtgcagaaagaatgattctttataaacttgatagtagtaaccatagataataaccagctataggtgataagttgtaacac  
 ctgagcattacacagcctgtccaaggtatcctttgagccaattcccatacattattgtgccccggctggtttgcgattctaa  
 aatgtaataataagacgttcaatggaacaggaccatgtacaatgtcagcacagtaaatgtacacatggaatcaggccagt  
 agtatcaactcaactgctgttaaatggcagtctagcagaagaagatgtagtaattagatctgccaatttcacagacaatgctaa  
 aaccataatagtagctgaacacatctgtagaataatgtacaagaccaacaacaatacaagaaaagatccgtatcc  
 agaggggaccaggagagcatttgttacaataggaaaaataggaaatagagacaagcacattgtaacattagtagagcaa  
 aatggaatgccactttaaacagatagctagcaaataagagaacaatttggaaataataaaacaataatcttaagcaatcct  
 caggaggggaccagaaattgtaacgcacagtttaattgtggaggggaatttttctactgtaattcaacacaactgttaatag  
 acttggttaatagtagtactggagtagtgaaggtcaaataacactgaaggaagtgcacaatcacactcccatgcagaataaa



acaattataaacatgtggcaggaagtaggaaaagcaatgtatgccctcccatcagtgacaaattagatgttcatcaaatat  
 tactgggctgctattaacaagagatggtgtaataacaacaatgggtccgagatctcagacctggaggaggcgatagagg  
 gacaattggagaagtgaattatataaatataaagtagtaaaaattgaaccattaggagtagcaccaccaaggcaagagaa  
 gagtggcagagagaaaaagagcagtggaataggagctttgtccttgggttctgggagcagcaggaagcactatgg  
 gctgcacgtcaatgacgctgacggtacaggccagacaattattgtctgatatagtcagcagcagaacaattgctgagggc  
 tattgaggcgcaacagcatctgttgaactcacagctctggggcatcaaacagctccaggcaagaatcctggctgtgaaag  
 atacctaaggatcaacagctcctggggatttggggtgtctctggaactcatttgcaccactgctgtgccttgaatgctagt  
 tggagtaataaatctctggaacagatttgaataacatgacctggatggagtgggacagagaaattaacaattacacaagctt  
 aatacactcctaattgaagaatcgaaaaccagcaagaaaagaatgaacaagaattattggaattagataaatgggcaagtt  
 tgtggaattggttaacataacaattggctgtggtatataaaattattcataatgatagtaggaggcttgtaggttaagaatag  
 tttgtctgactttctatagtgaaatagattaggcaggatattcaccattatcgtttcagaccacctcccaatcccgggggac  
 ccgacaggcccgaaggaatagaagaagaaggtggagagagagacagagacagatccattcgattagtgaacggatcctt  
 agcacttatctgggacgatctgaggagcctgtgcctctcagctaccaccgcttgagagacttactcttgattgaacgaggatt  
 gtggaactctgggacgcaggggggtggaagccctcaaatattggtggaatctctacagtattggagtcaggaactaaaga  
 atagtgtgtaacttgctcaatgccacagccatagcagtagctgaggggacagatagggttatagaagtattacaagcagct  
 tatagagctattcgccacatacctagaagaataagacagggcttgaaaggattttgctataa

**Tat (x2)**

accacctcccaatcccgaggggacccgacaggcccgaaggaatag

**Rev (x2)**

accacctcccaatcccgaggggacccgacaggcccgaaggaatagaagaagaaggtggagagagagacagagaca  
 gatccattcgattagtgaacggatccttagcacttatctgggacgatctgaggagcctgtgcctctcagctaccaccgcttga  
 gagacttactcttgattgaacgaggattgtggaactctgggacgcaggggggtggaagccctcaaatattggtggaatctcc  
 tacagtattggagtcaggaactaaagaatag

**Nef**

Atgggtggcaagtgtgcaaaaagtagtgattggatggcctgctgtaagggaaagaatgagacgagctgagccagcagc  
 agatggggtgggagcagtatctgagacctagaaaaacatggagcaatcacaagtagcaatacagcagctaacaatgctg  
 cttgtgcctggctagaagcacaagaggaggaagaggtgggtttccagtcacacctcaggtacctttaagaccaatgacttac  
 aaggcagctgtagatcttagccacttttaaaagaaaaggggggactggaagggttaattcactcccaagaagacaagat  
 atccttgatctgtgatctaccacacacaaggctacttccctgattggcagaactacacaccagggccaggggtcagatatac  
 cactgaccttggatggtgctacaagctagtaccagttgagccagataaggtagaagaggccaataaaggagagaaacacc  
 agcttgttacacctgtgagcctgcatggaatggatgaccctgagagagaagtgttagagtgagggtttgacagccgcctag  
 catttcatcacgtggcccagagctgcatccggagtactcaagaactgctga
